# Supplementary material for: Empirical Support for the Involvement Load Hypothesis (ILH): A Systematic Review
Source: MDPI journal article supplement (doi:10.3390/bs12100354), 2022-09-23
Supplement: s1 [file s1]

**Supplementary Table S1.** Specific search strings of the databases

| <b>ProQuest Dissertations &amp; Theses Global (ProQuest)</b>                                                                                                                                                                                                                                                                                                                                                                                                                                                                                                                                                                                                                                                                            |
|-----------------------------------------------------------------------------------------------------------------------------------------------------------------------------------------------------------------------------------------------------------------------------------------------------------------------------------------------------------------------------------------------------------------------------------------------------------------------------------------------------------------------------------------------------------------------------------------------------------------------------------------------------------------------------------------------------------------------------------------|
| <p>((ab("ILH") OR ti("ILH") OR diskw("ILH")) OR (ab("involvement load") OR ti("involvement load") OR diskw("involvement load"))) OR (ab("task effectiveness") OR ti("task effectiveness") OR diskw("task effectiveness"))) OR (ab(task-induced) OR ti(task-induced) OR diskw(task-induced)))</p>                                                                                                                                                                                                                                                                                                                                                                                                                                        |
| <p><b>AND</b></p> <p>((ab(word*) OR ti(word*) OR diskw(word*)) OR (ab(vocab*) OR ti(vocab*) OR diskw(vocab*))) OR (ab(collocation*) OR ti(collocation*) OR diskw(collocation*))) OR (ab("n gram") OR ti("n gram") OR diskw("n gram")) OR (ab(idiom*) OR ti(idiom*) OR diskw(idiom*)) OR (ab(lex*) OR ti(lex*) OR diskw(lex*)) OR (ab(chunk*) OR ti(chunk*) OR diskw(chunk*)) OR (ab(phras*) OR ti(phras*) OR diskw(phras*)) OR (ab(pattern*) OR ti(pattern*) OR diskw(pattern*)) OR (ab(formulaic*) OR ti(formulaic*) OR diskw(formulaic*)) OR (ab(figurative*) OR ti(figurative*) OR diskw(figurative*)) OR (ab(fixed-frame*) OR ti(fixed-frame*) OR diskw(fixed-frame*)) OR (ab(binomial*) OR ti(binomial*) OR diskw(binomial*)))</p> |
| <p><b>LIMITS APPLIED</b></p> <ol style="list-style-type: none"> <li>1. Search by document title, abstract, and index terms</li> <li>2. Unselect full-text</li> <li>3. Select all dates</li> <li>4. Select English only</li> </ol>                                                                                                                                                                                                                                                                                                                                                                                                                                                                                                       |
| <b>Educational Resources Information Center (ERIC)</b>                                                                                                                                                                                                                                                                                                                                                                                                                                                                                                                                                                                                                                                                                  |

(TI "ILH" OR AB "ILH") OR (TI "involvement load" OR AB "involvement load") OR  
 ("task effectiveness" OR AB "task effectiveness") OR (task-induced OR AB task-induced)

#### **AND**

(TI word\* OR AB word\*) OR (TI vocab\* OR AB vocab\*) OR (TI collocation\* OR AB  
 collocation\*) OR (TI “n gram” OR AB “n gram”) OR (TI idiom\* OR AB idiom\*) OR (TI  
 lex\* OR AB lex\*) OR (TI chunk\* OR AB chunk\*) OR (TI phras\* OR AB phras\*) OR (TI  
 pattern\* OR AB pattern\*) OR (TI formulaic\* OR AB formulaic\*) OR (TI figurative\* OR  
 AB figurative\*) OR (TI fixed-frame\* OR AB fixed-frame\*) OR (TI binomial\* OR AB  
 binomial\*)

#### **LIMITS APPLIED**

1. Must be ERIC only
2. Select Peer Reviewed
3. Unselect the "full-text" option
4. Select all publication types
5. Select all intended audience
6. Select equivalent subjects
7. Unselect apply related words
8. Leave date of publication blank (all years-unspecified)
9. Select title or abstract
10. Select English only

**Institute of Electrical and Electronics Engineers (IEEE)**

("Document Title": "ILH" OR "Document Title": "involvement load" OR "Document Title": "task effectiveness" OR "Document Title": "task induced") OR ("Abstract": "ILH" OR "Abstract": "involvement load" OR "Abstract": "task effectiveness" OR "Abstract": "task induced") OR ("Index Terms": "ILH" OR "Index Terms": "involvement load" OR "Index Terms": "task effectiveness" OR "Index Terms": "task induced")

## **AND**

According to the regulations of IEEE database, the terms which related to vocabulary were manually checked by the researchers.

## **LIMITS APPLIED**

IEEE regulations:

1. Limit the total number of wildcards to 7
2. Limit search terms to 20
3. Limited combined search terms to 50

General limits:

4. Search by abstract, index terms, document title
5. Select all dates (1884-2022)
6. Select English only

## **Web of Science (WOS)**

“ILH” (Topic) or “involvement load” (Topic) or “task effectiveness” (Topic) or task-induced (Topic)

## **AND**

word\* (Topic) or vocab\* (Topic) or collocation\* (Topic) or “n gram” (Topic) or idiom\* (Topic) or lex\* (Topic) or chunk\* (Topic) or phras\* (Topic) or pattern\* (Topic) or formulaic\* (Topic) or figurative\* (Topic) or fixed-frame\* (Topic) or binomial\* (Topic)

### **LIMITS APPLIED**

1. Choose WOS core collection
2. Search by topic
3. Select English only
4. Select all years (1980 – 2021)

### **Scopus**

(( TITLE-ABS-KEY ( {ILH} )) OR ( TITLE-ABS-KEY ( {involvement load} ))  
OR ( TITLE-ABS-KEY ( {task effectiveness} )) OR ( TITLE-ABS-KEY ( {task  
induced} )))

### **AND**

(( TITLE-ABS-KEY ( word\* )) OR ( TITLE-ABS-KEY ( vocab\* )) OR ( TITLE-  
ABS-KEY ( collocation\* )) OR ( TITLE-ABS-KEY ( {n gram} )) OR ( TITLE-  
ABS-KEY ( idiom\* )) OR ( TITLE-ABS-KEY ( lex\* )) OR ( TITLE-ABS-KEY ( chunk\* )) OR ( TITLE-ABS-KEY ( phras\* )) OR ( TITLE-ABS-KEY ( pattern\* )) OR ( TITLE-ABS-KEY ( formulaic\* )) OR ( TITLE-ABS-KEY ( figurative\* )) OR ( TITLE-ABS-KEY ( fixed AND frame\* )) OR ( TITLE-ABS-KEY ( binomial\* )))

### **LIMITS APPLIED**

1. Search by abstract, article title, keywords

- |                                                                                                                |
|----------------------------------------------------------------------------------------------------------------|
| <ol style="list-style-type: none"><li>2. Select all dates (1788-2021)</li><li>3. Select English only</li></ol> |
|----------------------------------------------------------------------------------------------------------------|

*Note.* The Scopus, WOS, and ProQuest database searches were conducted on 31 July 2021. The IEEE and ERIC database searches were conducted on August 1, 2021. To improve the reliability of database retrieval, each database was retrieved twice. A comparison of the two rounds of database searches showed that the same number of articles were identified.

**Supplementary Figure S1. Prisma 2020 flow diagram**

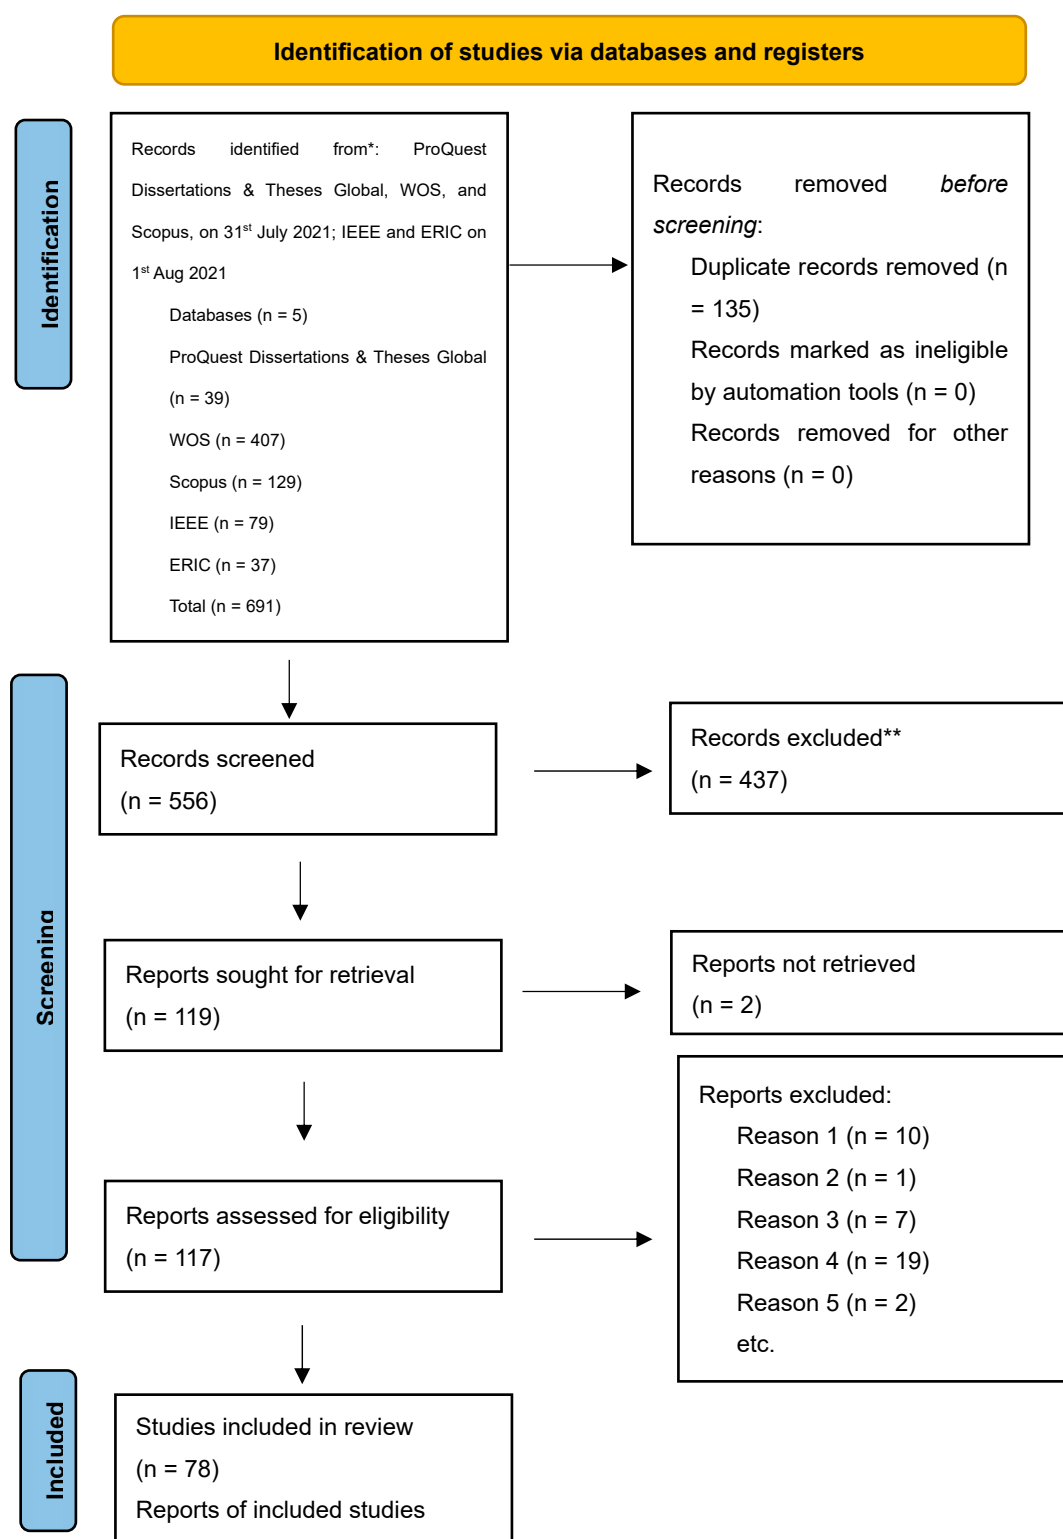

**Supplementary Table S2.** Coding framework for systematic review of the ILH

| Code                           | Coding criteria                                                                                                                                                                                          |
|--------------------------------|----------------------------------------------------------------------------------------------------------------------------------------------------------------------------------------------------------|
| Publication year               | When was the study published?                                                                                                                                                                            |
| Author                         | Who wrote the study?                                                                                                                                                                                     |
| Country or Region              | In which country or region was the study conducted?                                                                                                                                                      |
| Publication type               | What publication type is this study?                                                                                                                                                                     |
| Research aim/objective         | What is the research aim/objective of the study?                                                                                                                                                         |
| Hypotheses                     | “Hypotheses are declarative statements in quantitative research in which the investigator makes a prediction or a conjecture about the outcomes of a relationship” (Creswell & Guetterman, 2019, p.623). |
| Theoretical framework          | “A theoretical framework advances an abstract and formalized set of assumptions to guide the design and conduct of the research” (Creswell & Creswell, 2018, p.309).                                     |
| Quantitative research (QUAN)   | Quantitative research “is a means for testing objective theories by examining the relationship among variables” (Creswell & Creswell, 2018, p.334).                                                      |
| Qualitative research (QUAL)    | Qualitative research “is a means for exploring and understanding the meaning individuals or groups ascribe to a social or human problem” (Creswell & Creswell, 2018, p.333).                             |
| Mixed methods research (MIXED) | Mixed methods research “is an approach to inquiry that combines or integrates both qualitative and quantitative forms of research” (Creswell & Creswell, 2018, p.331).                                   |
| Research design                | Research designs are “procedures for collecting, analyzing, and reporting research in quantitative and qualitative research (e.g., experiments)” (Creswell & Guetterman, 2019, p.628).                   |
| Target word                    | What words were chosen as the target words in this study?                                                                                                                                                |
| Task type                      | What types of tasks were investigated in the study?                                                                                                                                                      |
| Time on task                   | In the study, how long did it take participants to complete the task?                                                                                                                                    |
| Vocabulary outcome measures    | What measurement tools did the study use to measure the effects of vocabulary learning tasks?                                                                                                            |
| Standardized test              | “A test that has been screened for reliability and validity on a large population, and calibrated on the group of test takers for whom it is intended” (García, 2003, p.432)                             |
| Researcher designed test       | The researchers developed their own test and tested it on a group of participants in a specific study.                                                                                                   |
| Receptive form (RF)            | “What does the word sound like” (Nation, 2013, p.49)?<br>“What does the word look like” (Nation, 2013, p.49)?<br>“What parts are recognizable in this word” (Nation, 2013, p.49)?                        |
| Receptive meaning (RM)         | “What parts are recognizable in this word” (Nation, 2013, p.49)?<br>“What is included in the concept” (Nation, 2013, p.49)?<br>“What others words does this word make us think of” (Nation, 2013, p.49)? |

|                                   |                                                                                                                                                                                                                                           |
|-----------------------------------|-------------------------------------------------------------------------------------------------------------------------------------------------------------------------------------------------------------------------------------------|
| Receptive using (RU)              | <p>“In what patterns does the word occur” (Nation, 2013, p.49)?</p> <p>“What words or types of word occur with this one” (Nation, 2013, p.49)?</p> <p>“Where, when, and how often would we meet this word” (Nation, 2013, p.49)?</p>      |
| Productive form (PF)              | <p>“How is the word pronounced” (Nation, 2013, p.49)?</p> <p>“How is the word written and spelled” (Nation, 2013, p.49)?</p> <p>“What words parts are needed to express meaning” (Nation, 2013, p.49)?</p>                                |
| Productive meaning (PM)           | <p>“What word form can be used to express this meaning” (Nation, 2013, p.49)?</p> <p>“What items can be concept refer to” (Nation, 2013, p.49)?</p> <p>“What other words could we use instead of this one” (Nation, 2013, p.49)?</p>      |
| Productive use (PU)               | <p>“In what patterns must we use this word” (Nation, 2013, p.49)?</p> <p>“What words or types of words must we use with this one” (Nation, 2013, p.49)?</p> <p>“Where, when and how often can we use this word” (Nation, 2013, p.49)?</p> |
| Foreign language                  | <p>Is this study about foreign language learning? What country's language?</p> <p>E.g., A foreign language is “a language that one learns in a classroom which is situated in an unnatural linguistic setting” (Du, 2008, p.10).</p>      |
| Foreign language learning context | <p>It is defined as “the circumstance where the second language learners have little exposure to the L2 outside of the classroom” (Wei, 2019, p.7).</p>                                                                                   |
| Second language                   | <p>Is this study about second language learning? What country's language?</p> <p>E.g., A second language is a “language other than one's first language that one studies or acquires in a naturalistic setting” (Du, 2008, pp.10-11)</p>  |
| Second language learning context  | <p>It is defined as “the context where English is the official language and as such, it is widely used inside and outside the classroom” (Al Khalidi, 2016, p.18).</p>                                                                    |
| First language                    | <p>What are the participants' first languages (i.e., the language that the participants learn to speak first as a child)?</p>                                                                                                             |
| Sample size                       | <p>What was the actual sample size in the study?</p>                                                                                                                                                                                      |
| Education level                   | <p>What was the educational level of the participants?</p>                                                                                                                                                                                |
| Language proficiency level        | <p>What was the level of language proficiency of the study participants?</p>                                                                                                                                                              |
| Learning setting                  | <p>What was the learning setting?</p>                                                                                                                                                                                                     |
| Vocabulary learning tasks         | <p>What were the learning tasks involved in the study?</p>                                                                                                                                                                                |



|                               |                                                                                                                                                                                                                                                                                                                                                                               |
|-------------------------------|-------------------------------------------------------------------------------------------------------------------------------------------------------------------------------------------------------------------------------------------------------------------------------------------------------------------------------------------------------------------------------|
| Quantitative research results | What were the main results? Were the effect sizes reported?                                                                                                                                                                                                                                                                                                                   |
| Qualitative research findings | What were the main findings?                                                                                                                                                                                                                                                                                                                                                  |
| Need                          | “Need is moderate when it is imposed by an external agent” (Laufer & Hulstijn, 2001, p.14).<br>“Need is strong when imposed on the learner by him- or herself” (Laufer & Hulstijn, 2001, p.14).                                                                                                                                                                               |
| Search                        | “Search is the attempt to find the meaning of an unknown L2 word or trying to find the L2 word form expressing a concept by consulting a dictionary or another authority” (Laufer & Hulstijn, 2001, p.14).                                                                                                                                                                    |
| Evaluation                    | Evaluation is moderate “when it entails recognizing differences between words, or differences between several senses of a word in a given context” (Laufer & Hulstijn, 2001, p.15).<br>Evaluation is strong when it “requires making a decision about additional words which will combine with the new word in an original sentence or text” (Laufer & Hulstijn, 2001, p.15). |
| Involvement Load (IL)         | The IL refers to “The combination of the presence or absence of the involvement factors Need, Search, and Evaluation” (Laufer & Hulstijn, 2001, p.15).                                                                                                                                                                                                                        |

#### References:

- Al Khalidi, I. J. A. S. (2016). Investigating the process of EAP course design by teachers at a tertiary level, English department, a private college in Oman from the perspectives of teachers and students [EdD in TESOL, University of Exeter].
- Creswell, J., & Creswell, J. D. (2018). *Research Design: Qualitative, Quantitative, and Mixed Methods Approaches* (5 ed.). SAGE Publications.
- Creswell, J. W., & Guetterman, T. C. (2019). *Educational research: Planning, conducting, and evaluating quantitative* (6 ed.). Pearson.
- Du, W.-H. (2008). Integrating culture learning into foreign language curricula: An examination of the ethnographic interview approach in a Chinese as a foreign language classroom The University of Wisconsin-Milwaukee].
- García, P. (2003). The use of high school exit examinations in four southwestern states. *Bilingual Research Journal*, 27(3), 431-450.
- Laufer, B., & Hulstijn, J. (2001). Incidental vocabulary acquisition in a second language: The construct of task-induced involvement. *Applied Linguistics*, 22(1), 1-26.  
<https://doi.org/10.1093/applin/22.1.1>
- Nation, I. (2013). *Learning vocabulary in another language* (Vol. 10). Cambridge university press Cambridge.
- Wei, L. (2019). Promoting English language proficiency through Quality Talk: An intervention with Mandarin-speaking students The Pennsylvania State University.

**Supplementary Table S3.** The summary of 78 reviewed studies: basic information

| No. | Study Author (year)        | Country or region     | Research approaches | N   | L1              | L2      | Language context | Educational level |
|-----|----------------------------|-----------------------|---------------------|-----|-----------------|---------|------------------|-------------------|
| 1   | Hulstijn and Laufer (2001) | Israel<br>Netherlands | QUAN                | 186 | Dutch<br>Hebrew | English | Foreign language | Tertiary          |
| 2   | Hill and Laufer (2003)     | Hong Kong             | QUAN                | 96  | Chinese         | English | Foreign language | Tertiary          |
| 3   | Beal (2007)                | Canada                | MIXED               | 118 | French          | English | Second language  | Tertiary          |
| 4   | Peters (2007)              | Belgium               | MIXED               | 84  | Dutch           | German  | Foreign language | Tertiary          |
| 5   | Keating (2008)             | United States         | QUAN                | 79  | English         | Spanish | Foreign language | Tertiary          |
| 6   | Kim (2008)                 | United States         | QUAN                | 104 | Mixed           | English | Second language  | Mixed             |
| 7   | Laufer and Girsai (2008)   | Israel                | QUAN                | 75  | Hebrew          | English | Foreign language | Secondary         |
| 8   | Pulido (2009)              | United States         | QUAN                | 35  | English         | Spanish | Foreign language | Tertiary          |
| 9   | Xu (2009)                  | China                 | MIXED               | 152 | Chinese         | English | Foreign language | Tertiary          |
| 10  | Cheng (2011)               | Taiwan                | QUAN                | 111 | Chinese         | English | Foreign language | Tertiary          |
| 11  | Rukholm (2011)             | Canada                | QUAN                | 66  | MIXED           | Italian | Foreign language | Tertiary          |
| 12  | Eckerth and Tavakoli       | UK                    | QUAN                | 30  | MIXED           | English | Second           | Tertiary          |

|    |                                    |         |       |     |                                     |         |                  |                                     |
|----|------------------------------------|---------|-------|-----|-------------------------------------|---------|------------------|-------------------------------------|
|    | (2012)                             |         |       |     |                                     |         | language         |                                     |
| 13 | Maleki (2012)                      | Iran    | QUAN  | 80  | Hebrew                              | English | Foreign language | Tertiary                            |
| 14 | Nassaji and Hu (2012)              | Canada  | QUAN  | 32  | Chinese                             | English | Second language  | Tertiary                            |
| 15 | Peters (2012)                      | Belgium | QUAN  | 56  | Dutch                               | English | Foreign language | Tertiary                            |
| 16 | Tsubaki (2012)                     | Japan   | MIXED | 301 | Japanese                            | English | Foreign language | Tertiary                            |
| 17 | Vosoughi (2012)                    | Iran    | QUAN  | 73  | Persian                             | English | Foreign language | Tertiary                            |
| 18 | Arseven (2013)                     | Egypt   | QUAN  | 57  | Arabic                              | English | Mixed            | Tertiary                            |
| 19 | Cao (2013)                         | China   | QUAN  | 70  | Chinese                             | English | Foreign language | Tertiary                            |
| 20 | Touti (2013)                       | Iran    | QUAN  | 64  | Persian                             | English | Foreign language | Extra-curricular language education |
| 21 | Mármol and Sánchez-Lafuente (2013) | Spain   | QUAN  | 28  | Spanish                             | English | Foreign language | Primary                             |
| 22 | Rouhi and Mohebbi (2013)           | Iran    | QUAN  | 62  | Azari-Turkish & Persian (bilingual) | English | Foreign language | Extra-curricular language education |
| 23 | Tajeddin and Daraee (2013)         | Iran    | QUAN  | 45  | Persian                             | English | Foreign language | Extra-curricular language education |
| 24 | Jahangiri and Abilipour (2014)     | Iran    | QUAN  | 27  | Persian                             | English | Foreign language | Extra-curricular language education |
| 25 | Li (2014)                          | China   | MIXED | 81  | Chinese                             | English | Foreign language | Tertiary                            |

|    |                                 |                      |       |     |         |         |                  |                                     |
|----|---------------------------------|----------------------|-------|-----|---------|---------|------------------|-------------------------------------|
| 26 | Sarbazi (2014)                  | Iran                 | QUAN  | 30  | Persian | English | Foreign language | Extra-curricular language education |
| 27 | Bao (2015)                      | China                | QUAN  | 153 | Chinese | English | Foreign language | Tertiary                            |
| 28 | Pourakbari and Biria (2015)     | Iran                 | QUAN  | 150 | Persian | English | Foreign language | Tertiary                            |
| 29 | Soleimani and Rahmanian (2015)  | Iran                 | QUAN  | 33  | N.A.    | English | Foreign language | Extra-curricular language education |
| 30 | Wang (2015)                     | Taiwan               | QUAN  | 64  | Chinese | English | Foreign language | Tertiary                            |
| 31 | Ansarin and Bayazidi (2016)     | Iran                 | QUAN  | 72  | MIXED   | English | Foreign language | Tertiary                            |
| 32 | Hu and Nassaji (2016)           | Taiwan               | QUAN  | 96  | Chinese | English | Foreign language | Tertiary                            |
| 33 | Tang and Treffers-Daller (2016) | China                | QUAN  | 185 | Chinese | English | Foreign language | Secondary                           |
| 34 | Zou (2016)                      | China                | MIXED | 104 | Chinese | English | Foreign language | Tertiary                            |
| 35 | Alharbi (2017)                  | Saudi Arabia         | QUAN  | 129 | Arabic  | English | Foreign language | Tertiary                            |
| 36 | Dowswell (2017)                 | United Arab Emirates | QUAN  | 29  | Arabic  | English | Foreign language | Tertiary                            |
| 37 | Lee and Pulido (2017)           | South Korea          | QUAN  | 135 | Korean  | English | Foreign language | Secondary                           |
| 38 | Teng (2017)                     | China                | QUAN  | 90  | Chinese | English | Foreign language | Tertiary                            |
| 39 | Qin and Teng (2017)             | China                | MIXED | 60  | Chinese | English | Foreign language | Tertiary                            |

|    |                               |           |       |      |         |         |                  |                                     |
|----|-------------------------------|-----------|-------|------|---------|---------|------------------|-------------------------------------|
| 40 | Rassaei (2017)                | Iran      | QUAN  | 88   | Farsi   | English | Foreign language | Extra-curricular language education |
| 41 | Sauer (2016)                  | Denmark   | MIXED | 269  | MIXED   | English | Foreign language | Secondary                           |
| 42 | Snoder (2017)                 | Sweden    | QUAN  | 59   | Swedish | English | Foreign language | Secondary                           |
| 43 | Tahmasbi and Farvardin (2017) | Iran      | QUAN  | 130  | Persian | English | Foreign language | Secondary                           |
| 44 | F. Teng (2017)                | China     | QUAN  | 77   | Chinese | English | Foreign language | Tertiary                            |
| 45 | Tong (2017)                   | China     | QUAN  | 96   | Chinese | English | Foreign language | Tertiary                            |
| 46 | Yang et al. (2017)            | China     | QUAN  | 81   | Chinese | English | Foreign language | Tertiary                            |
| 47 | Zou (2017)                    | China     | MIXED | 147  | Chinese | English | Foreign language | Tertiary                            |
| 48 | Alkhudiry (2018)              | England   | QUAN  | 40   | Arabic  | English | Second language  | Tertiary                            |
| 49 | Gohar et al. (2018)           | Iran      | QUAN  | 90   | Persian | English | Foreign language | Extra-curricular language education |
| 50 | Huang (2018)                  | China     | MIXED | N.A. | Chinese | English | Foreign language | Tertiary                            |
| 51 | Ong and Zhang (2018)          | Singapore | QUAN  | 154  | Chinese | English | Second language  | Tertiary                            |
| 52 | Silva and Otwinowska (2018)   | Poland    | QUAN  | 38   | Polish  | English | Foreign language | Primary                             |
| 53 | Alanazi (2019)                | USA       | MIXED | 4    | Arabic  | English | Second language  | Tertiary                            |

|    |                               |              |       |     |            |         |                  |                                     |
|----|-------------------------------|--------------|-------|-----|------------|---------|------------------|-------------------------------------|
| 54 | Alavinia and Rahimi (2019)    | Iran         | QUAN  | 125 | Persian    | English | Foreign language | Tertiary                            |
| 55 | Bao (2019)                    | China        | QUAN  | 167 | Chinese    | English | Foreign language | Tertiary                            |
| 56 | Dai et al. (2019)             | China        | QUAN  | 70  | Chinese    | English | Foreign language | Tertiary                            |
| 57 | Kıvrak (2019)                 | Turkey       | QUAN  | 236 | Turkish    | English | Foreign language | Tertiary                            |
| 58 | Nguyen and Boers (2019)       | Vietnam      | QUAN  | 64  | Vietnamese | English | Foreign language | Tertiary                            |
| 59 | Alahmadi and Foltz (2020)     | Saudi Arabia | QUAN  | 61  | Arabic     | English | Foreign language | Tertiary                            |
| 60 | Alarjani (2020)               | Saudi Arabia | QUAN  | 30  | Arabic     | English | Foreign language | Tertiary                            |
| 61 | Arabiana et al. (2020)        | Philippines  | MIXED | 6   | Cebuano    | English | Foreign language | Primary                             |
| 62 | Chiu and Chen (2020)          | Taiwan       | QUAN  | 32  | Chinese    | English | Foreign language | Primary                             |
| 63 | Danilina and Shabunina (2020) | Ukraine      | MIXED | 19  | Ukrainian  | English | Foreign language | Tertiary                            |
| 64 | Dongho (2020)                 | Korea        | QUAN  | 29  | Korean     | English | Foreign language | Tertiary                            |
| 65 | Kaivanpanah et al. (2020)     | Iran         | QUAN  | 120 | N.A.       | English | Foreign language | Extra-curricular language education |
| 66 | Kamali et al. (2020)          | Iran         | QUAN  | 66  | Farsi      | English | Foreign language | Extra-curricular language education |
| 67 | Namaziandost et al. (2020)    | Iran         | QUAN  | 40  | Persian    | English | Foreign language | Tertiary                            |

|    |                                         |         |       |     |                            |         |                  |                                     |
|----|-----------------------------------------|---------|-------|-----|----------------------------|---------|------------------|-------------------------------------|
| 68 | Rassaei (2020)                          | Iran    | QUAN  | 47  | Persian                    | English | Foreign language | Extra-curricular language education |
| 69 | Xu and Zhang (2020)                     | USA     | MIXED | 22  | English                    | Chinese | Foreign language | Tertiary                            |
| 70 | Yang and Cao (2020)                     | China   | QUAN  | 144 | Chinese                    | English | Foreign language | Extra-curricular language education |
| 71 | Alcaraz-Marmol (2021)                   | Spain   | QUAN  | 60  | Spanish                    | English | Foreign language | Primary                             |
| 72 | Ansarin and Khabbazi (2021)             | Iran    | QUAN  | 204 | Persian                    | English | Foreign language | Tertiary                            |
| 73 | Danilina (2021)                         | Ukraine | MIXED | 29  | Ukrainian                  | English | Foreign language | Tertiary                            |
| 74 | Hanks (2021)                            | Mixed   | QUAN  | 19  | MIXED                      | English | Foreign language | Extra-curricular language education |
| 75 | San Mateo-Valdehita and de Diego (2021) | France  | QUAN  | 308 | French                     | Spanish | Foreign language | Tertiary                            |
| 76 | Silva et al. (2021)                     | Poland  | QUAN  | 39  | Polish or Slavic languages | English | Foreign language | Tertiary                            |
| 77 | Taheri and Golandouz (2021)             | Iran    | QUAN  | 78  | Persian                    | English | Foreign language | Extra-curricular language education |
| 78 | Teng and Zhang (2021)                   | China   | QUAN  | 120 | Chinese                    | English | Foreign language | Tertiary                            |

**Supplementary Table S4.** The summary of 78 reviewed studies: the tasks

| No. | Study<br>Author (year)     | Task                                                                                                                                                                                                                                                                                          | The IL was<br>provided by the<br>original author. | The IL was re-<br>calculated in this<br>review. |
|-----|----------------------------|-----------------------------------------------------------------------------------------------------------------------------------------------------------------------------------------------------------------------------------------------------------------------------------------------|---------------------------------------------------|-------------------------------------------------|
| 1   | Hulstijn and Laufer (2001) | 1. Reading + glosses (1+0+0)<br>2. Reading + glosses + fill-in-the blanks (1+0+1)<br>3. Composition-writing + glosses (1+0+2)                                                                                                                                                                 | Yes                                               | No                                              |
| 2   | Hill and Laufer (2003)     | 1. Reading + E-dictionary + yes/no questions (1+1+1)<br>2. Reading + E-dictionary + multiple-choice (1+1+1)<br>3. Reading + E-dictionary + multiple-choice (1+1+1)<br>4. Control: Reading (0+0+0)                                                                                             | No                                                | Yes                                             |
| 3   | Beal (2007)                | 1. Reading + glosses +highlighting (1+0+1)<br>2. Reading + multiple-choice (1+1+1)<br>3. Reading +dictionary + sentences-writing (1+2+2)<br>4. Control: Reading (0+0+0)                                                                                                                       | Yes                                               | Yes                                             |
| 4   | Peters (2007)              | 1. Reading + E-dictionary + comprehension questions with plus relevant words and minus relevant words in incidental learning context (1+1+0)<br>2. Reading + E-dictionary + comprehension questions with plus relevant words and minus relevant words in intentional learning context (1+1+0) | No                                                | Yes                                             |
| 5   | Keating (2008)             | 1. Reading + glosses + true/false (1+0+0)<br>2. Reading + glosses (8 target words + 4 distractors) on a separate page + fill-in-the-blanks + true/false (1+0+1)<br>3. Glosses (8 target words + 4 distractors) + sentences-writing (using the target words) (1+0+2)                           | Yes                                               | No                                              |
| 6   | Kim (2008)                 | Experiment 1:                                                                                                                                                                                                                                                                                 | Yes                                               | No                                              |



|    |                          |                                                                                                                                                                                                                                                                                                                                                                                                                                                                                                                                                                                   |     |     |
|----|--------------------------|-----------------------------------------------------------------------------------------------------------------------------------------------------------------------------------------------------------------------------------------------------------------------------------------------------------------------------------------------------------------------------------------------------------------------------------------------------------------------------------------------------------------------------------------------------------------------------------|-----|-----|
|    |                          | 1. Reading + glosses + comprehension questions (1+0+0)<br>2. Reading + glosses (target words + 5 distractors) on a separate page + comprehension questions + fill-in-the-blanks (1+0+1);<br>3. Composition-writing + glosses (1+0+2)<br>Experiment 2:<br>1. Composition-writing + glosses (1+0+2)<br>2. Sentences-writing + glosses (1+0+2)                                                                                                                                                                                                                                       |     |     |
| 7  | Laufer and Girsai (2008) | Meaning focused instruction (MFI):<br>1. Reading + comprehension questions (0+0+0) or (1+1+1)<br>2. Reading + open discussion (0+0+0) or (1+1+1)<br><br>Note: During these activities, some of the target words may have been used by some learners. However, they were not singled out for teaching.<br>Form focused instruction (FFI):<br>1. Reading + multiple-choice (1+1+0)<br>2. Reading + fill-in-the-blanks (1+1+1)<br>Contrastive analysis and translation (CAT)<br>1. Reading + translation (from L2 to L1) (1+1+1)<br>2. Reading + translation (from L1 to L2) (1+1+2) | Yes | No  |
| 8  | Pulido (2009)            | 1. Reading + translation (familiar topic) (1+1+0)<br>2. Reading + translation (unfamiliar topic) (1+0+1)                                                                                                                                                                                                                                                                                                                                                                                                                                                                          | No  | Yes |
| 9  | Xu (2009)                | 1. Reading + glosses + multiple-choice (1+0+0)<br>2. Reading + glosses + fill-in-the-blanks (1+0+1)<br>3. Reading + glosses + sentences-writing (1+0+2)                                                                                                                                                                                                                                                                                                                                                                                                                           | No  | Yes |
| 10 | Cheng (2011)             | 1. Reading with target words highlighted + glosses on a separate page (1+0+0)<br>2. Reading + fill-in-the-blank + word list on a separate page + E-                                                                                                                                                                                                                                                                                                                                                                                                                               | Yes | No  |

|    |                             |                                                                                                                                                                                                                                                                                                                                                                                                                                                                                                                                                                                                                                                                                                                                                 |     |    |
|----|-----------------------------|-------------------------------------------------------------------------------------------------------------------------------------------------------------------------------------------------------------------------------------------------------------------------------------------------------------------------------------------------------------------------------------------------------------------------------------------------------------------------------------------------------------------------------------------------------------------------------------------------------------------------------------------------------------------------------------------------------------------------------------------------|-----|----|
|    |                             | dictionary (1+1+1)<br>3. Reading + word list on a separate page + E-dictionary +sentences-writing (1+1+2)                                                                                                                                                                                                                                                                                                                                                                                                                                                                                                                                                                                                                                       |     |    |
| 11 | Rukholm (2011)              | High IL tasks<br>Task set 1:<br>1. Reading + discussion with peers + meaning-inferring (2+1+1)<br>2. Dictionary + sentences-writing (1+1+2)<br>Task set 2:<br>1. Fill-in-the-blanks + word list (12 target words + 2 distractors) (1+1+1)<br>Task set 3:<br>1. Composition-writing + word list (5 target words) +meaning-inferring (2+1+2)<br>Low IL tasks<br>1. Reading + glosses + irrelevant comprehension questions (0+0+0)<br>2. Reading + glosses + irrelevant true/false questions (0+0+0)<br>3. Reading + glosses + comprehension questions (L1) + response in L1 sentences (1+0+0)<br>4. Glosses + irrelevant fill-in-the-blanks (0+0+0)<br>5. Glosses + comprehension questions (L1 mixed with L2) + response in L1 sentences (1+0+0) | Yes | No |
| 12 | Eckerth and Tavakoli (2012) | 1. Reading + marginal glosses (1+0+0)<br>2. Fill-in-the-blanks + word list (target words + definitions) (1+0+1)<br>3. Reading +marginal glosses + composition-writing (1+0+2)                                                                                                                                                                                                                                                                                                                                                                                                                                                                                                                                                                   | Yes | No |
| 13 | Maleki (2012)               | 1. Listening + irrelevant multiple-choice + glosses (0+0+0)                                                                                                                                                                                                                                                                                                                                                                                                                                                                                                                                                                                                                                                                                     | Yes | No |

|    |                       |                                                                                                                                                                                                                                                                                   |     |     |
|----|-----------------------|-----------------------------------------------------------------------------------------------------------------------------------------------------------------------------------------------------------------------------------------------------------------------------------|-----|-----|
|    |                       | 2. Listening + multiple-choice + glosses (1+0+0)<br>3. Listening + multiple-choice + glosses + sentences-writing (1+0+2)                                                                                                                                                          |     |     |
| 14 | Nassaji and Hu (2012) | 1. Reading + marginal multiple-choice glosses (1+0+1)<br>2. Reading + meaning-inferring (1+1+1)<br>3. Reading (i.e., the derivational text) + form-meaning-fit (1+2+2)                                                                                                            | Yes | No  |
| 15 | Peters (2012)         | Message-oriented group:<br>1. Reading + marginal glosses + relevant comprehension questions in L1 (1+0+0)<br>Vocabulary-oriented group:<br>2. Reading + marginal glosses + translation + multiple-choice (1+0+1)                                                                  | No  | Yes |
| 16 | Tsubaki (2012)        | 1. Multiple-choice + sentences-writing in L1 (1+1+2)<br>2. Multiple-choice + sentences-copying in L2 (1+1+1)                                                                                                                                                                      | Yes | Yes |
| 17 | Vosoughi (2012)       | 1. Reading + reading (i.e., other passages with the same target words) + irrelevant comprehension questions (1+1+0)<br>2. Reading + dictionary work (i.e., copy example sentence, synonym, and pronunciation from dictionary) (1+1+0)<br>3. Reading + translation (1+1+0)         | Yes | Yes |
| 18 | Arseven (2013)        | 1. Reading + multiple-choice + E-dictionary (1+1+0)<br>2. Reading + multiple-choice + glosses (1+0+0)                                                                                                                                                                             | No  | Yes |
| 19 | Cao (2013)            | 1. Reading + comprehension questions + glosses at the bottom (1+0+0)<br>2. Reading + reading comprehension questions + glosses (10 target words + 5 distractors) on a separate page + fill-in-the-blanks (1+0+1)<br>3. Reading + reading comprehension questions + glosses at the | Yes | No  |

|    |                                    |                                                                                                                                                                                                                                                                                                                                             |     |     |
|----|------------------------------------|---------------------------------------------------------------------------------------------------------------------------------------------------------------------------------------------------------------------------------------------------------------------------------------------------------------------------------------------|-----|-----|
|    |                                    | bottom + sentences-writing (1+0+2)                                                                                                                                                                                                                                                                                                          |     |     |
| 20 | Touti (2013)                       | 1. Reading + fill-in-the-blanks + glosses on a separate page + comprehension questions (1+0+1)<br>2. Reading + glosses on a separate page + composition-writing (1+0+2)                                                                                                                                                                     | No  | Yes |
| 21 | Mármol and Sánchez-Lafuente (2013) | 1. Reading + comprehension questions + glosses (1+0+0)<br>2. Reading + comprehension questions + fill-in-the-blanks + glosses (18 target words + 9 distractors) (1+0+1)<br>3. Glosses + sentences-writing (1+0+2)<br>4. Dictionary + sentences-writing (1+1+2)                                                                              | Yes | No  |
| 22 | Rouhi and Mohebbi (2013)           | 1. Reading + E-glosses (i.e., pictorial & sound features) (1+0+0)<br>2. Reading + E-glosses (i.e., pictorial features) (1+0+0)<br>3. Reading + E-glosses (i.e., video features) (1+0+0)<br>4. Control: Reading + teacher instructions in regular classes (1+0+0)                                                                            | No  | Yes |
| 23 | Tajeddin and Daraee (2013)         | 1. Control: Reading + irrelevant comprehension questions (0+0+0)<br>2. Message-oriented task: Reading + true/false (1+1+0)<br>3. Form-oriented task: Reading + meaning-matching (1+1+1)                                                                                                                                                     | Yes | No  |
| 24 | Jahangiri and Abilipour (2014)     | Individual<br>1. Sentences-writing + dictionary (i.e., 3 target words) (1+0+2)<br>2. Fill-in-the-blanks + dictionary (i.e., 2 target words + 1 distractor) (1+0+1)<br>Collaborative<br>3. Sentences-writing + dictionary (i.e., 3 target words) (1+0+2)<br>4. Fill-in-the-blanks + dictionary (i.e., 2 target words + 1 distractor) (1+0+1) | Yes | Yes |
| 25 | Li (2014)                          | 1. Reading + irrelevant true/false questions (0+0+0)                                                                                                                                                                                                                                                                                        | Yes | No  |

|    |                                |                                                                                                                                                                                                                                                                                                                                                                                                                                  |     |     |
|----|--------------------------------|----------------------------------------------------------------------------------------------------------------------------------------------------------------------------------------------------------------------------------------------------------------------------------------------------------------------------------------------------------------------------------------------------------------------------------|-----|-----|
|    |                                | 2. Reading + relevant true/false questions (1+1+0)<br>3. Reading + fill-in-the-blanks (i.e., 9 target words + 5 distractors) + relevant true/false questions (1+1+1)<br>4. Reading + sentences-writing (1+1+2)                                                                                                                                                                                                                   |     |     |
| 26 | Sarbazi (2014)                 | 1. Reading + glosses + irrelevant true/false (0+0+0)<br>2. Reading + glosses + true/false (1+0+0)<br>3. Reading + glosses + true/false + composition-writing (1+0+2)                                                                                                                                                                                                                                                             | Yes | Yes |
| 27 | Bao (2015)                     | 1. Control: Reading + glosses + irrelevant matching (0+0+0)<br>2. Reading + glosses + translation (1+0+0)<br>3. Reading + glosses + fill-in-the-blanks (1+0+1)<br>4. Reading + glosses + segments-combining (1+0+1)<br>5. Reading + glosses + sentences-writing (1+0+2)                                                                                                                                                          | Yes | No  |
| 28 | Pourakbari and Biria (2015)    | Receptive vocabulary tasks:<br>1. Reading + glosses + graphic organizers + true/false (1+0+0)<br>2. Reading + glosses + graphic organizers + matching (1+0+1)<br>3. Reading + dictionary + multiple-choice (1+1+1)<br>Productive vocabulary tasks:<br>1. Reading + glosses + short-response (1+0+0)<br>2. Reading + glosses + graphic organizers + fill-in-the-blanks (1+0+1)<br>3. Reading + glosses + sentence-writing (1+0+2) | Yes | No  |
| 29 | Soleimani and Rahmanian (2015) | 1. Reading + glosses in L2 + fill-in-the-blanks + irrelevant comprehension questions (1+0+1)<br>2. Reading + glosses in L1 + irrelevant comprehension questions + sentences-writing (1+0+2)<br>3. Reading + glosses in L1 + multiple-choice (1+0+0)                                                                                                                                                                              | Yes | No  |
| 30 | Wang (2015)                    | 1. Reading (0+0+0)<br>2. Reading + glosses (1+0+0)                                                                                                                                                                                                                                                                                                                                                                               | Yes | Yes |

|    |                                 |                                                                                                                                                                                                                                                                                                                                                                                                           |     |     |
|----|---------------------------------|-----------------------------------------------------------------------------------------------------------------------------------------------------------------------------------------------------------------------------------------------------------------------------------------------------------------------------------------------------------------------------------------------------------|-----|-----|
|    |                                 | <p>3. Reading + glosses + fill-in-the-blanks (1+0+1)</p> <p>4. Reading + glosses + fill-in-the-blanks + sentences-writing (1+0+2)</p> <p>Note: The author calculated the SUM of different tasks as accumulated loads.</p> <p>Task 1 + Task 2 = 1</p> <p>Task 1 + Task 2 + Task 3 = 3</p> <p>Task 1 + Task 2 + Task 3 + Task 4 = 5</p>                                                                     |     |     |
| 31 | Ansarin and Bayazidi (2016)     | <p>Task type was used as a within-subject factor</p> <p>1. Glosses in a mini-dictionary format (18 target words + 3 distractors) + multiple-choice * 3 sets (1+0+0)</p> <p>2. Glosses in a mini-dictionary format (18 target words + 3 distractors) + fill-in-the-blanks * 3 sets (1+0+1)</p> <p>3. Glosses in a mini-dictionary format (18 target words + 3 distractors) + sentences-writing (1+0+2)</p> | Yes | Yes |
| 32 | Hu and Nassaji (2016)           | <p>1. Reading + multiple-choice (1+1+0)</p> <p>2. Reading + multiple-choice (definition) (1+1+0)</p> <p>3. Reading + glosses on a separate page (14 target words + extra distractors) + fill-in-the-blanks (1+0+1)</p> <p>4. Reading + sentences-rewording (1+1+1)</p>                                                                                                                                    | Yes | Yes |
| 33 | Tang and Treffers-Daller (2016) | <p>1. Reading + glosses in the text (0+0+0)</p> <p>2. Reading + glosses in the text + irrelevant multiple-choice (0+0+0)</p> <p>3. Reading + glosses in the end + multiple-choice (1+0+0)</p> <p>4. Reading + marginal glosses with multiple meanings + multiple-choice (1+0+1)</p> <p>5. Reading + glosses in the end with multiple meanings + multiple-choice (1+0+1)</p>                               | Yes | Yes |

|    |                       |                                                                                                                                                                                                                                                                                                                                                                                                                                                                             |     |     |
|----|-----------------------|-----------------------------------------------------------------------------------------------------------------------------------------------------------------------------------------------------------------------------------------------------------------------------------------------------------------------------------------------------------------------------------------------------------------------------------------------------------------------------|-----|-----|
|    |                       | 6. Reading + marginal glosses with multiple meanings + sentences-writing (1+0+2)                                                                                                                                                                                                                                                                                                                                                                                            |     |     |
| 34 | Zou (2016)            | 1. Reading + dictionary use + multiple choice (1+1+0)<br>2. Reading + meaning-inferring + irrelevant multiple choice (1+1+0)                                                                                                                                                                                                                                                                                                                                                | No  | Yes |
| 35 | Alharbi (2017)        | 1. Teacher-fronted/non-corpus assisted CAT (contrastive analysis and translation) condition + L2 to L1 translation (1+1+1)<br>2. Teacher-fronted/ non-corpus assisted CAT condition + L1 to L2 translation (1+1+2)<br>3. Corpus-assisted CAT + L2 to L1 translation (1+2+1)<br>4. Corpus-assisted CAT + L1 to L2 translation (1+2+2)<br>5. Corpus-assisted non-CAT condition + multiple-choice (1+1+1)<br>6. Corpus-assisted non-CAT condition + fill-in-the-blanks (1+1+1) | Yes | Yes |
| 36 | Dowswell (2017)       | 1. Vocabulary Self-Collection Strategy Plus (VSS+) + wiki (2+2+2)<br>2. Control: regular course (0+0+0)                                                                                                                                                                                                                                                                                                                                                                     | No  | Yes |
| 37 | Lee and Pulido (2017) | Reading (passage 1) + interest rating scale + irrelevant multiple-choice in L1 + reading (passage 2) + interest rating scale + irrelevant multiple-choice in L1 + intervening number task (0+0+0)                                                                                                                                                                                                                                                                           | No  | Yes |
| 38 | Teng (2017)           | 1. Reading + glosses (1+0+0)<br>2. Reading + word list (target words + distracters) + fill-in-the-blanks (1+0+1)<br>3. Reading + glosses + composition-writing (1+0+2)                                                                                                                                                                                                                                                                                                      | Yes | No  |

|    |                     |                                                                                                                                                                                                                                                                                                                                                                                                                                                                                                                                                                                                                                                                                                                                                                                                                                                                                                                                                                                                                             |     |     |
|----|---------------------|-----------------------------------------------------------------------------------------------------------------------------------------------------------------------------------------------------------------------------------------------------------------------------------------------------------------------------------------------------------------------------------------------------------------------------------------------------------------------------------------------------------------------------------------------------------------------------------------------------------------------------------------------------------------------------------------------------------------------------------------------------------------------------------------------------------------------------------------------------------------------------------------------------------------------------------------------------------------------------------------------------------------------------|-----|-----|
| 39 | Qin and Teng (2017) | <p>1. Reading + glosses (1+0+0)</p> <p>2. Reading + word list (target words + distracters) + fill-in-the-blanks (1+0+1)</p> <p>3. Reading + glosses + composition-writing (1+0+2)</p>                                                                                                                                                                                                                                                                                                                                                                                                                                                                                                                                                                                                                                                                                                                                                                                                                                       | Yes | No  |
| 40 | Rassaei (2017)      | <p>Summarizing condition:</p> <p>1. [Output instruction session: Reading + intervention (i.e., Teacher taught summarization rules)] + [Output activity session: Reading + comprehension questions in L1 + Task 1 (i.e., Glosses + summaries-writing)] (1+0+2)</p> <p>Predicting condition:</p> <p>2. [Output instruction session: Reading + intervention (i.e., Teacher taught prediction strategy)] + [Output activity session: Reading + comprehension questions in L1 + Task 2 (i.e., Glosses + predictions-writing)] (1+0+2)</p> <p>Questioning/answering condition:</p> <p>3. [Output instruction session: Reading + intervention (i.e., Teacher taught comprehension question generating skills)] + [Output activity session: Reading + comprehension questions in L1 + Task 3 (i.e., Glosses + comprehension questions and answers-writing)] (1+0+2)</p> <p>Control:</p> <p>4. [No output instruction session] + [Activity session: Reading + comprehension questions in L1 + Task 4 (i.e., True/false)] (1+0+0)</p> | No  | Yes |
| 41 | Sauer (2016)        | <p>1. Reading + bold-printing + multiple-choice &amp; true/false &amp; short-response + irrelevant post-reading exercises (1+0+1)</p> <p>2. Reading + glosses + multiple-choice &amp; true/false &amp; short-</p>                                                                                                                                                                                                                                                                                                                                                                                                                                                                                                                                                                                                                                                                                                                                                                                                           | No  | Yes |



|    |                               |                                                                                                                                                                                                                                                                                                                                                                                                                                                                                                                                                                                                                         |     |     |
|----|-------------------------------|-------------------------------------------------------------------------------------------------------------------------------------------------------------------------------------------------------------------------------------------------------------------------------------------------------------------------------------------------------------------------------------------------------------------------------------------------------------------------------------------------------------------------------------------------------------------------------------------------------------------------|-----|-----|
|    |                               | <p>response + irrelevant post-reading exercises (1+0+1)</p> <p>3. Reading + bold-printing &amp; glosses + multiple-choice &amp; true/false &amp; short-response + irrelevant post-reading exercises (1+0+1)</p> <p>4. Control: Reading + multiple-choice &amp; true/false &amp; short-response + irrelevant post-reading exercises (1+1+1)</p>                                                                                                                                                                                                                                                                          |     |     |
| 42 | Snoder (2017)                 | <p>1. Listening + fill-in-the-blanks + glosses (1+0+1)</p> <p>2. Listening + sentences-writing + glosses (1+0+2)</p> <p>3. Listening + fill-in-the-blanks + L1 glosses + dictionary (1+1+1)</p> <p>4. Listening + sentences-writing + L1 glosses + dictionary (1+1+2)</p>                                                                                                                                                                                                                                                                                                                                               | Yes | No  |
| 43 | Tahmasbi and Farvardin (2017) | <p>1. [Reading task: Reading + glosses in text] + [Task 1: Dictionary + composition-writing (1+1+2)]</p> <p>2. [Reading task: Reading + glosses in text] + [Task 2: Dictionary + sentences-writing (1+1+2)]</p> <p>3. [Reading task: Reading + glosses in text] + [Task 3: Segments-combining (1+0+1)]</p> <p>4. [Reading task: Reading + glosses in text] + [Task 4: Dictionary + translation (1+1+0)]</p> <p>5. [Reading task: Reading + glosses in text] + [Task 4: Fill-in-the-blanks + word list (1+0+1)]</p> <p>6. Control: [Reading task: Reading + glosses in text] + [Task 6: Irrelevant matching (0+0+0)]</p> | Yes | Yes |
| 44 | F. Teng (2017)                | <p>1. Reading + dictionary (1+1+0)</p> <p>2. Reading + dictionary + fill-in-the-blanks + word list (1+1+1)</p> <p>3. Reading + dictionary + composition-writing (1+1+2)</p>                                                                                                                                                                                                                                                                                                                                                                                                                                             | Yes | No  |
| 45 | Tong (2017)                   | 1. Reading + glosses + translation (1+0+0)                                                                                                                                                                                                                                                                                                                                                                                                                                                                                                                                                                              | No  | Yes |

|    |                     |                                                                                                                                                                                                                                                                                                                                         |     |     |
|----|---------------------|-----------------------------------------------------------------------------------------------------------------------------------------------------------------------------------------------------------------------------------------------------------------------------------------------------------------------------------------|-----|-----|
|    |                     | 2. Reading + glosses in multiple-choice format + translation (1+0+1)<br>3. Reading + glosses in multiple-choice format + short-response (1+0+1)<br>4. Reading + glosses + short-response (1+0+0)                                                                                                                                        |     |     |
| 46 | Yang et al. (2017)  | 1. Reading + glosses + irrelevant multiple-choice + sentences-writing (1+0+2)<br>2. Reading + glosses + irrelevant multiple-choice + fill-in-the-blanks + glosses (8 target words + 4 distracters) (1+0+1)<br>3. Reading + glosses + irrelevant multiple-choice + irrelevant short-response (0+0+0)<br>4. Control: Normal class (0+0+0) | Yes | Yes |
| 47 | Zou (2017)          | 1. Fill-in-the-blanks in a reading text + glosses (1+0+1)<br>2. Sentences-writing + glosses (1+0+2)<br>3. Composition-writing + glosses (1+0+2)                                                                                                                                                                                         | Yes | No  |
| 48 | Alkhudiry (2018)    | Elaboration task:<br>1. Reading + glosses + multiple-choice + sentences-writing (1+0+2)<br>2. Reading + glosses + multiple-choice + sentences-writing (distractor version that did not contain non-words) (0+0+0)                                                                                                                       | Yes | Yes |
| 49 | Gohar et al. (2018) | 1. Glosses + sentences-writing (1+0+2)<br>2. Glosses + composition-writing (1+0+2)<br>3. Reading + glosses + short-response (1+0+0)                                                                                                                                                                                                     | Yes | Yes |
| 50 | Huang (2018)        | 1. Reading + irrelevant comprehension questions + glosses + true/false (1+0+0)<br>2. Reading + irrelevant comprehension questions + dictionary (1+1+0)<br>3. Reading + irrelevant comprehension questions + glosses +                                                                                                                   | Yes | No  |

|    |                             |                                                                                                                                                                                                                                                                                                                                       |     |     |
|----|-----------------------------|---------------------------------------------------------------------------------------------------------------------------------------------------------------------------------------------------------------------------------------------------------------------------------------------------------------------------------------|-----|-----|
|    |                             | segments-combination (1+0+1)<br>4. Reading + irrelevant comprehension questions + dictionary + fill-in-the-blanks (1+1+1)<br>5. Reading + irrelevant comprehension questions + glosses + sentences-writing (1+0+2)<br>6. Reading + irrelevant comprehension questions + dictionary + sentences-writing (1+1+2)                        |     |     |
| 51 | Ong and Zhang (2018)        | Code-switched (CS) reading task: L1 text with L2 target words<br>1. Reading + meaning-inferring (1+1+0)<br>Control: L2 text<br>2. Reading + meaning-inferring (1+1+0)                                                                                                                                                                 | Yes | Yes |
| 52 | Silva and Otwinowska (2018) | 1. Reading + glosses + sentences-writing (1+0+2)<br>2. Reading + glosses + [multiple-choice comprehension questions (L1)] + [wordlist+ matching (i.e., pictures)] (1+0+1)<br>3. Reading + glosses in multiple-choice format (L1) + [multiple-choice comprehension questions (L1)] + [creating associations (i.e., L1 or L2)] (1+1+1)  | Yes | Yes |
| 53 | Alanazi (2019)              | 1. Reading + glosses + sentences-writing (1+0+1)<br>2. Reading + glosses + fill-in-the-blanks (i.e., 6 target words + 2 distractors) (1+0+2)                                                                                                                                                                                          | Yes | No  |
| 54 | Alavinia and Rahimi (2019)  | 1. Reading + glosses in the text + dictionary + sentences-writing (1+0+2)<br>2. Reading + glosses in the text + definition (1+0+0)<br>3. Reading + glosses in the text + fill-in-the-blanks (1+0+1)<br>4. Reading + glosses in the text + segments combination (1+0+1)<br>5. Control: Reading + glosses + irrelevant matching (0+0+0) | Yes | Yes |
| 55 | Bao (2019)                  | 1. Reading + glosses in the text + matching (1+0+1)<br>2. Reading + glosses in the text + fill-in-the-blanks (1+0+1)                                                                                                                                                                                                                  | Yes | No  |

|    |                   |                                                                                                                                                                                                                                                                                                                                                                                                                                                                                                                                                                                                                                                                                                                                                                                                                                                                                                                                                                                                                                                         |     |    |
|----|-------------------|---------------------------------------------------------------------------------------------------------------------------------------------------------------------------------------------------------------------------------------------------------------------------------------------------------------------------------------------------------------------------------------------------------------------------------------------------------------------------------------------------------------------------------------------------------------------------------------------------------------------------------------------------------------------------------------------------------------------------------------------------------------------------------------------------------------------------------------------------------------------------------------------------------------------------------------------------------------------------------------------------------------------------------------------------------|-----|----|
|    |                   | 3. Reading + glosses in the text + multiple-choice (1+0+1)<br>4. Reading + glosses in the text + segments combination (1+0+1)                                                                                                                                                                                                                                                                                                                                                                                                                                                                                                                                                                                                                                                                                                                                                                                                                                                                                                                           |     |    |
| 56 | Dai et al. (2019) | 1. Reading [E-dictionary + conceptual metaphor information (i.e., salient) + 7-10 example sentences] + multiple-choice (1+1+1)<br>2. Reading [E-dictionary + conceptual metaphor information (i.e., not salient) + 1 example sentence] + multiple-choice (1+2+1)<br>3. Control: Reading [E-dictionary + 1 example sentence] + multiple-choice (1+2+1)                                                                                                                                                                                                                                                                                                                                                                                                                                                                                                                                                                                                                                                                                                   | Yes | No |
| 57 | Kıvrak (2019)     | 1. Control: Brief irrelevant discussion + reading + irrelevant comprehension questions & answer check + irrelevant peer-discussions (0+0+0)<br>2. Control: Brief irrelevant discussion + watching (i.e., video podcasts) + irrelevant comprehension questions & answer check + irrelevant peer-discussions (0+0+0)<br>3. Brief irrelevant discussion + fill-in-the-blanks in a reading text + glosses + answer check + irrelevant comprehension questions & answer check + irrelevant peer-discussions (1+0+1)<br>4. Brief irrelevant discussion + watching (i.e., video podcasts) + glosses + fill-in-the-blanks in selected sentences + answer check + 2nd watching + irrelevant comprehension questions & answer check + irrelevant peer-discussions (1+0+1)<br>5. Brief irrelevant discussion + reading + glosses + target word in bold print + less irrelevant comprehension questions & answer check + sentences-writing + answer check + irrelevant peer-discussions (1+0+2)<br>6. Brief irrelevant discussion + glosses + watching (i.e., video | Yes | No |

|    |                               |                                                                                                                                                                                                                                                                                                                                                                                                                                                                                                                    |     |     |
|----|-------------------------------|--------------------------------------------------------------------------------------------------------------------------------------------------------------------------------------------------------------------------------------------------------------------------------------------------------------------------------------------------------------------------------------------------------------------------------------------------------------------------------------------------------------------|-----|-----|
|    |                               | podcasts) + 2nd watching + less irrelevant comprehension questions & answer check + sentences-writing + answer check + irrelevant peer-discussions (1+0+2)                                                                                                                                                                                                                                                                                                                                                         |     |     |
| 58 | Nguyen and Boers (2019)       | 1. Watching (i.e., TED Talk) + note-taking + summarizing (i.e., orally) + 2nd watching + yes/no (i.e., without access to TED Talk) (1+0+2)<br>2. Watching (i.e., TED Talk) + note-taking + revise and organize note + 2nd watching + yes/no (i.e., without access to TED Talk) (1+0+1)                                                                                                                                                                                                                             | No  | Yes |
| 59 | Alahmadi and Foltz (2020)     | 1. Reading + meaning-inferring (1+1+0)<br>2. Reading + dictionary (1+1+0)                                                                                                                                                                                                                                                                                                                                                                                                                                          | No  | Yes |
| 60 | Alarjani (2020)               | 1. Glosses + sentences-writing (1+0+2)<br>2. Control: Glosses (1+0+0)                                                                                                                                                                                                                                                                                                                                                                                                                                              | No  | Yes |
| 61 | Arabiana et al. (2020)        | 1. Watching + various ungraded tasks (IL=N.A.)                                                                                                                                                                                                                                                                                                                                                                                                                                                                     | No  | No  |
| 62 | Chiu and Chen (2020)          | Traditional face-to-face storytelling session:<br>1. Listening + reading (i.e., the Keynote) + watching (i.e., the scaffolds from the storyteller's face or body) + word-meaning focused comprehension questions + summarizing (i.e., peer and group discussions) (1+0+2)<br>Computer-mediated communication (CMC) storytelling session:<br>2. Watching (i.e., the picture book and animation) + listening + word-meaning focused comprehension questions + summarizing (i.e., peer and group discussions) (1+0+2) | Yes | Yes |
| 63 | Danilina and Shabunina (2020) | Intentional:<br>1. Attending vocabulary lesson (i.e., in class) + composition-writing (i.e., at home) (1+0+2)<br>Incidental:<br>2. Watching (i.e., online video at home) + irrelevant                                                                                                                                                                                                                                                                                                                              | Yes | No  |

|    |                            |                                                                                                                                                                                                                                                                                                                                                                                                                                                                         |     |     |
|----|----------------------------|-------------------------------------------------------------------------------------------------------------------------------------------------------------------------------------------------------------------------------------------------------------------------------------------------------------------------------------------------------------------------------------------------------------------------------------------------------------------------|-----|-----|
|    |                            | composition-writing (i.e., at home) (1+1+2)                                                                                                                                                                                                                                                                                                                                                                                                                             |     |     |
| 64 | Dongho (2020)              | 1. Reading + target words in bold + dictionary + 5 multiple-choice comprehension questions + 5 multiple-choice vocabulary questions (1+1+0)<br>2. Fill-in-the-blanks (i.e., in text) + glosses + 5 multiple-choice comprehension questions (1+0+1)<br>3. Fill-in-the-blanks (i.e., in text) + word list + dictionary (1+1+1)                                                                                                                                            | Yes | No  |
| 65 | Kaivanpanah et al. (2020)  | Input tasks:<br>1. Reading + dictionary + comprehension questions (1+1+1)<br>2. Reading + glosses + irrelevant comprehension questions (0+0+0)<br>Output tasks:<br>3. Reading + fill-in-the-blanks (i.e., in the text) + glosses (10 target words + 5 distractors) on a separate page + comprehension questions (1+0+1)<br>4. Reading + glosses + composition-writing (1+0+2)<br>Phase 1: Task 1 vs. Task 4<br>Phase 2: Task 1 vs. Task 3<br>Phase 3: Task 2 vs. Task 3 | Yes | No  |
| 66 | Kamali et al. (2020)       | 1. Reading + glosses (i.e., in the text) + summarizing (i.e., orally) (1+0+2)<br>2. Reading + glosses (i.e., in the text) + summarizing (i.e., writing) (1+0+2)<br>3. Control: Reading + glosses (i.e., in the text) + true/false (1+0+0)                                                                                                                                                                                                                               | Yes | No  |
| 67 | Namaziandost et al. (2020) | 1. Reading + dictionary + comprehension questions (1+1+1)<br>2. Fill-in-the-blanks in the text + glosses (1+0+1)                                                                                                                                                                                                                                                                                                                                                        | Yes | Yes |

|    |                             |                                                                                                                                                                                                                                                                                                                                                                                                                                                                                                        |     |     |
|----|-----------------------------|--------------------------------------------------------------------------------------------------------------------------------------------------------------------------------------------------------------------------------------------------------------------------------------------------------------------------------------------------------------------------------------------------------------------------------------------------------------------------------------------------------|-----|-----|
| 68 | Rassaei (2020)              | 1. E-reading + E-dynamic glosses (1+1+1)<br>2. E-reading + glosses (1+0+0)<br>3. Control: E-reading (0+0+0)                                                                                                                                                                                                                                                                                                                                                                                            | Yes | No  |
| 69 | Xu and Zhang (2020)         | 1. Meaning-inferring (1+1+0)<br>2. Meaning-inferring + context (i.e., sentences) (1+1+1)                                                                                                                                                                                                                                                                                                                                                                                                               | No  | Yes |
| 70 | Yang and Cao (2020)         | 1. Reading + comprehension questions + graphic organizer + irrelevant glosses (0+0+0)<br>2. Reading + comprehension questions + graphic organizer + glosses (1+0+0)<br>3. Fill-in-the-blanks (i.e., in the text) + irrelevant comprehension questions + glosses (8 target words +2 distractors) (1+0+1)<br>4. Fill-in-the-blanks (i.e., in the text) + irrelevant comprehension questions + dictionary (1+1+1)<br>5. Reading + irrelevant comprehension questions+ glosses + sentences-writing (1+0+2) | Yes | No  |
| 71 | Alcaraz-Marmol (2021)       | 1. Reading + meaning inferring + dynamic glosses (1+1+1)<br>2. Reading + glosses (1+0+0)<br>3. Control: Reading (0+0+0)                                                                                                                                                                                                                                                                                                                                                                                | No  | Yes |
| 72 | Ansarin and Khabbazi (2021) | 1. Listening + multiple-choice comprehension questions + sentences-writing + glosses (1+0+2)<br>2. Listening + multiple-choice comprehension questions + fill-in-the-blanks (i.e., in the text) + glosses (20 target words + 4 distractors) (1+0+1)<br>3. Listening + multiple-choice comprehension questions + summarizing (i.e., writing) (0+0+0)                                                                                                                                                    | Yes | No  |
| 73 | Danilina (2021)             | Incidental:<br>1. Composition-writing + reading & find collocations + peer discussion + fill-in-the-blanks (1+2+0)                                                                                                                                                                                                                                                                                                                                                                                     | Yes | Yes |

|    |                                         |                                                                                                                                                                                                                                                                                                                                |     |     |
|----|-----------------------------------------|--------------------------------------------------------------------------------------------------------------------------------------------------------------------------------------------------------------------------------------------------------------------------------------------------------------------------------|-----|-----|
|    |                                         | <p>Intentional:</p> <p>2. Reading &amp; find collocations + peer discussion + composition-writing (1+2+2)</p> <p>3. Translation (i.e., an artificial need) + reading &amp; find collocations + memorizing (1+1+1)</p>                                                                                                          |     |     |
| 74 | Hanks (2021)                            | <p>1. Virtual, pre-recorded Zoom class session (i.e., vocabulary teaching) + multiple-choice (1+0+1)</p> <p>2. Virtual, pre-recorded Zoom class session (i.e., vocabulary teaching) + fill-in-the-blank (1+0+1)</p> <p>3. Virtual, pre-recorded Zoom class session (i.e., vocabulary teaching) + sentences-writing (1+0+2)</p> | No  | Yes |
| 75 | San Mateo-Valdehita and de Diego (2021) | <p>1. Multiple-choice + glosses (1+0+0)</p> <p>2. Fill-in-the-blanks + glosses (1+0+1)</p> <p>3. Sentence-writing + glosses (1+0+2)</p>                                                                                                                                                                                        | Yes | No  |
| 76 | Silva et al. (2021)                     | <p>1. Glosses + sentences-writing (1+0+2)</p> <p>2. Glosses + composition-writing (1+0+2)</p>                                                                                                                                                                                                                                  | No  | Yes |
| 77 | Taheri and Golandouz (2021)             | <p>1. Reading + glosses + sentences-writing without the original text (1+0+2)</p> <p>2. Reading + glosses + summarizing without the original text (1+0+2)</p> <p>3. Reading (i.e., incomplete stories) + glosses + making predictions (1+0+2)</p>                                                                              | Yes | No  |
| 78 | Teng and Zhang (2021)                   | <p>1. Reading + glosses (1+0+0)</p> <p>2. Reading + fill-in-the-blanks + glosses (i.e., target words + distracters) (1+0+1)</p> <p>3. Reading + glosses + composition writing (1+0+2)</p> <p>4. Reading + glosses+ E-dictionary + composition writing</p>                                                                      | Yes | Yes |



|  |  |         |  |  |
|--|--|---------|--|--|
|  |  | (1+1+2) |  |  |
|--|--|---------|--|--|

Note: The references listed below are in the same order as Table S3 and Table S4.

1. Hulstijn, I. H., & Laufer, B. (2001). Some empirical evidence for the involvement load hypothesis in vocabulary acquisition. *Language Learning*, 51(3), 539-558. <https://doi.org/10.1111/0023-8333.00164>
2. Hill, M., & Laufer, B. (2003). Type of task, time-on-task and electronic dictionaries in incidental vocabulary acquisition. *IRAL - International Review of Applied Linguistics in Language Teaching*, 41(2), 87-106. <https://doi.org/10.1515/iral.2003.007>
3. Beal, V. (2007). The weight of involvement load in college level reading and vocabulary tasks (Publication No. 85705044) [Master's thesis, Concordia University]. ProQuest Dissertations and Theses Global.
4. Peters, E. (2007). Manipulating L2 learners' online dictionary use and its effect on L2 word retention. *Language Learning & Technology*, 11(2), 36-58.
5. Keating, G. D. (2008). Task effectiveness and word learning in a second language: The involvement load hypothesis on trial. *Language Teaching Research*, 12(3), 365-386. <https://doi.org/10.1177/1362168808089922>
6. Kim, Y. (2008). The role of task-induced involvement and learner proficiency in L2 vocabulary acquisition. *Language Learning*, 58(2), 285-325. <https://doi.org/10.1111/j.1467-9922.2008.00442x>
7. Laufer, B., & Girsai, N. (2008). Form-focused instruction in second language vocabulary learning: A case for contrastive analysis and translation. *Applied Linguistics*, 29(4), 694-716. <https://doi.org/10.1093/applin/amn018>
8. Pulido, D. (2009). How involved are American L2 learners of Spanish in lexical input processing tasks during reading? *Studies in Second Language Acquisition*, 31(1), 31-58. <https://doi.org/10.1017/S0272263109090020>
9. Xu, J. (2009). An experimental study on the effects of different reading tasks on L2 vocabulary acquisition. *English Language Teaching*, 2(3), 69-79.
10. Cheng, H.-C. (2011). Vocabulary acquisition in learning English as a second language: Examining the involvement load hypothesis and language anxiety with Taiwanese college students (Publication No. 1031154652) [Doctoral dissertation, University of Northern Colorado]. ProQuest Dissertations and Theses Global.
11. Rukholm, V. N. (2011). *Facilitating lexical acquisition in beginner learners of Italian through popular song* (Publication No. 1323346428) [Doctoral dissertation, University of Toronto]. ProQuest Dissertations and Theses Global.
12. Eckerth, J., & Tavakoli, P. (2012). The effects of word exposure frequency and elaboration of word processing on incidental L2 vocabulary acquisition through reading. *Language Teaching Research*, 16(2), 227-252. <https://doi.org/10.1177/1362168811431377>
13. Maleki, N. A. (2012). The effect of the involvement load hypothesis on improving Iranian EFL learners' incidental vocabulary acquisition in

- 
- listening comprehension classes. *Australian Journal of Basic and Applied Sciences*, 6(9), 119-128.
14. Nassaji, H., & Hu, H. C. M. (2012). The relationship between task-induced involvement load and learning new words from context. *Iral-International Review of Applied Linguistics in Language Teaching*, 50(1), 69-86. <https://doi.org/10.1515/iral-2012-0003>
  15. Peters, E. (2012). The differential effects of two vocabulary instruction methods on EFL word learning: A study into task effectiveness. *Iral-International Review of Applied Linguistics in Language Teaching*, 5(3), 213-238. <https://doi.org/10.1515/iral-2012-0009>
  16. Tsubaki, M. (2012). Vocabulary learning with graphic organizers in the EFL environment: Inquiry into the involvement load hypothesis (Publication No. 1267036105) [Doctoral dissertation, Temple University]. ProQuest Dissertations and Theses Global.
  17. Vosoughi, M. (2012). Enhancing lexical knowledge through L2 medium tasks. *English Language Teaching*, 5(10), 34-42. <https://doi.org/10.5539/elt.v5n10p34>
  18. Arseven, S. (2013). The effects of marginal glosses and online dictionary use on incidental receptive and productive vocabulary acquisition through reading [Master's Thesis, the American University in Cairo]. AUC Knowledge Fountain. <https://fount.aucegypt.edu/etds/1154>
  19. Cao, Z. (2013). The effects of tasks on the learning of lexical bundles by Chinese EFL learners. *Theory and Practice in Language Studies*, 3(6), 957-962. <https://doi.org/10.4304/tpls.3.6.957-962>
  20. Touti, M. A. E. (2013). Task-type based vocabulary instruction an impact on incidental word retention. *World Applied Sciences Journal*, 22(12), 1739-1744. <https://doi.org/10.5829/idosi.wasj.2013.22.12.432>
  21. Mármol, G. A., & Sánchez-Lafuente, Á. A. (2013). The involvement load hypothesis: Its effect on vocabulary learning in primary education. *Revista Espanola de Linguistica Aplicada*, 26, 11-24.
  22. Rouhi, A., & Mohebbi, H. (2013). Glosses, spatial intelligence, and L2 vocabulary learning in multimedia context. *3L: Language, Linguistics, Literature*, 19(2), 75-87.
  23. Tajeddin, Z., & Daraee, D. (2013). Vocabulary acquisition through written input: Effects of form-focused, message-oriented, and comprehension tasks. *The Electronic Journal for English as a Second Language*, 16(4).
  24. Jahangiri, K., & Abilipour, I. (2014). Effects of collaboration and exercise type on incidental vocabulary learning evidence against involvement load hypothesis. *Procedia Social and Behavioral Sciences Proceedings of the International Conference on Current Trends in ELT*, Amsterdam.
  25. Li, J. (2014). Effect of task-induced online learning behavior on incidental vocabulary acquisition by Chinese learners - Revisiting involvement load hypothesis. *Theory and Practice in Language Studies*, 4(7), 1385-1394. <https://doi.org/10.4304/tpls.4.7.1385-1394>
  26. Sarbazi, M. R. (2014). Involvement load hypothesis: Recalling unfamiliar words meaning by adults across genders *Proceedings of the International Conference on Current Trends in ELT*, Amsterdam.

27. Bao, G. (2015). Task type effects on English as a Foreign Language learners' acquisition of receptive and productive vocabulary knowledge. *System*, 53, 84-95. <https://doi.org/10.1016/j.system.2015.07.006>
28. Pourakbari, A. A., & Biria, R. (2015). Efficacy of task-induced involvement in incidental lexical development of Iranian senior EFL students. *English Language Teaching*, 8(5), 122-131. <https://doi.org/10.5539/elt.v8n5p122>
29. Soleimani, H., & Rahmanian, M. (2015). Vocabulary acquisition and task effectiveness in involvement load hypothesis: A case in Iran. *International Journal of Applied Linguistics and English Literature*, 4(5), 198-205. <https://doi.org/10.7575/aiac.ijalel.v.4n.5p.19>
30. Wang, J. H. T. (2015). Task-induced involvement load: The accumulation effects on vocabulary acquisition. *Chinese Journal of Applied Linguistics*, 38(2), 150-165. <https://doi.org/10.1515/cjal-2015-0009>
31. Ansarin, A. A., & Bayazidi, A. (2016). Task type and incidental L2 vocabulary learning: Repetition versus task involvement load. *Southern African Linguistics and Applied Language Studies*, 34(2), 135-146. <https://doi.org/10.2989/16073614.2016.1201774>
32. Hu, H. C. M., & Nassaji, H. (2016). Effective vocabulary learning tasks: Involvement Load Hypothesis versus Technique Feature Analysis. *System*, 56, 28-39. <https://doi.org/10.1016/j.system.2015.11.001>
33. Tang, C., & Treffers-Daller, J. (2016). Assessing incidental vocabulary learning by Chinese EFL learners: a test of the involvement load hypothesis. In G. Yu & Y. Jin (Eds.), *Assessing Chinese Learners of English: Language Constructs, Consequences and Conundrums* (pp. 121-149). Palgrave Macmillan. <http://dx.doi.org/10.1057/9781137449788>
34. Zou, D. (2016). Comparing dictionary-induced vocabulary learning and inferencing in the context of reading. *Lexikos*, 26, 372-390.
35. Alharbi, R. M. (2017). Acquisition of lexical collocations: A corpus-assisted contrastive analysis and translation approach (Publication No. 2307366148) [Doctoral dissertation, Newcastle University]. ProQuest Dissertations and Theses Global.
36. Dowswell, K. (2017). Developing students' vocabulary knowledge in content subjects: A computational linguistic approach. Iaria Xps Press.
37. Lee, S., & Pulido, D. (2017). The impact of topic interest, L2 proficiency, and gender on EFL incidental vocabulary acquisition through reading. *Language Teaching Research*, 21(1), 118-135. <https://doi.org/10.1177/1362168816637381>
38. Teng, F. M. (2017). Investigating task-induced involvement load and vocabulary learning from the perspective of metacognition. *Pertanika Journal of Social Sciences and Humanities*, 25(4), 1753-1764.
39. Qin, C., & Teng, F. (2017). Assessing the correlation between task-induced involvement load, word learning, and learners' regulatory ability. *Chinese Journal of Applied Linguistics*, 40(3), 261-280. <https://doi.org/DOI:10.1515/cjal-2017-0015>
40. Rassaei, E. (2017). Effects of three forms of reading-based output activity on L2 vocabulary learning. *Language Teaching Research*, 21(1), 76-95. <https://doi.org/10.1177/1362168815606160>
41. Sauer, B. M. (2016). The effects of different types of textual input enhancements on incidental and intentional vocabulary learning from

- 
- reading (Publication No. 2230937984) [Doctoral dissertation, King's College London]. ProQuest Dissertations and Theses Global.
42. Snoder, P. (2017). Improving English learners' productive collocation knowledge: The effects of involvement load, spacing, and intentionality. *TESL Canada Journal*, 34(3), 140-164. <https://doi.org/10.18806/tesl.v34i3.1277>
  43. Tahmasbi, M., & Farvardin, M. T. (2017). Probing the effects of task types on EFL learners' receptive and productive vocabulary knowledge: The case of involvement load hypothesis. *SAGE Open*, 7(3), 1-10. <https://doi.org/10.1177/2158244017730596>
  44. Teng, F. (2017). The effects of task-induced involvement load on word learning and confidence judgments mediated by knowledge and regulation of cognition. *Educational Sciences: Theory & Practice*, 17(3), 791-808. <https://doi.org/10.12738/estp.2017.3.0167>
  45. Tong, S. (2017). Effects of glosses and involvement loads on incidental vocabulary acquisition. *Francis Acad Press*
  46. Yang, Y. L., Shintani, N., Li, S. F., & Zhang, Y. Y. (2017). The effectiveness of post-reading word-focused activities and their associations with working memory. *System*, 70, 38-49. <https://doi.org/10.1016/j.system.2017.09.012>
  47. Zou, D. (2017). Vocabulary acquisition through cloze exercises, sentence-writing and composition-writing: Extending the evaluation component of the involvement load hypothesis. *Language Teaching Research*, 21(1), 54-75. <https://doi.org/10.1177/1362168816652418>
  48. Alkhudiry, R. (2018). Exploring the relationship between vocabulary knowledge and reading comprehension in L1 Arabic learners of English (Publication No. 2189022640) [Doctoral dissertation, University of Reading]. ProQuest Dissertations and Theses Global.
  49. Gohar, M. J., Rahmanian, M., & Soleimani, H. (2018). Technique feature analysis or involvement load hypothesis: estimating their predictive power in vocabulary learning. *Journal of Psycholinguistic Research*, 47(4), 859-869. <https://doi.org/10.1007/s10936-018-9568-5>
  50. Huang, S. Y. (2018). A verification of involvement load hypothesis on chinese adult English learners. *International Journal of English Linguistics*, 8(5), 125-134. <https://doi.org/10.5539/ijel.v8n5p125>
  51. Ong, K. K. W., & Zhang, L. J. (2018). The effects of code-switched reading tasks on late-bilingual EFL learners' vocabulary recall, retention and retrieval. *System*, 72, 13-22. <https://doi.org/10.1016/j.system.2017.10.008>
  52. Silva, B., & Otwinowska, A. (2018). Vocabulary acquisition and young learners: Different tasks, similar involvement loads. *International Review of Applied Linguistics in Language Teaching*, 56(2), 205-229. <https://doi.org/10.1515/iral-2016-0097>
  53. Alanazi, Z. (2019). The effects of a sentence completion task vs. A sentence generation task on vocabulary learning: An exploratory study. *Linguistics Journal*, 13(1), 147-172.
  54. Alavinia, P., & Rahimi, H. (2019). Task types effects and task involvement load on vocabulary learning of EFL learners. *International Journal of Instruction*, 12(1), 1501-1516. <https://doi.org/10.29333/iji.2019.12196a>
  55. Bao, G. (2019). Comparing input and output tasks in EFL learners' vocabulary acquisition. *TESOL International Journal*, 14(1), 1-12.
  56. Dai, Y., Wu, Z., & Xu, H. (2019). The effect of types of dictionary presentation on the retention of metaphorical collocations: Involvement

- 
- load hypothesis vs. cognitive load theory. *International Journal of Lexicography*, 32(4), 411-431. <https://doi.org/10.1093/ijl/ecz010>
57. Kırarak, C. (2019). The effects of task involvement load and input type on foreign language vocabulary learning (Publication No. 2499374271) [Master Thesis, Marmara University]. ProQuest Dissertations and Theses Global.
  58. Nguyen, C. D., & Boers, F. (2019). The effect of content retelling on vocabulary uptake from a TED talk. *TESOL Quarterly*, 53(1), 5-29. <https://doi.org/10.1002/tesq.441>
  59. Alahmadi, A., & Foltz, A. (2020). Exploring the effect of lexical inferencing and dictionary consultation on undergraduate EFL students' vocabulary acquisition. *PLoS ONE*, 15(7), 25. <https://doi.org/10.1371/journal.pone.0236798>
  60. Alarjani, F. A. (2020). Involvement load hypothesis and the retention of word meaning among saudi EFL learners. *Asiatic*, 14(1), 160-173.
  61. Arabiana, E. F. S., Malifer, D. A. E. A., & Betonio, H. R. (2020). Video cartoons and task-induced involvement: effects to pupils' l2 incidental literacy acquisition. *English Language Teaching Educational Journal*, 3(2), 151-162.
  62. Chiu, H. H., & Chen, C. F. (2020). A comparison of EFL fifth graders' vocabulary acquisition through skype videoconferencing and face-to-face picture book storytelling. *Journal of Language and Education*, 6(2), 91-105. <https://doi.org/https://doi.org/10.17323/jle.2020.10082>
  63. Danilina, S., & Shabunina, V. (2020). Intentional vs incidental ESP vocabulary acquisition by political science students. *Advanced Education* (16), 18-27.
  64. Dongho, K. (2020). The effects of task-induced involvement on l2 academic word acquisition in Korea. *Korean Journal of English Language and Linguistics*, 2020 (20), 141-156. <https://doi.org/10.15738/kjell.20.202005.141>
  65. Kaivanpanah, S., Alavi, S. M., & Ravandpour, A. (2020). The effect of input-based and output-based tasks with different and identical involvement loads on Iranian EFL learners' incidental vocabulary learning. *Cogent Psychology*, 7(1), 16, Article 1731223. <https://doi.org/10.1080/23311908.2020.1731223>
  66. Kamali, M., Behjat, F., & Bagheri, M. S. (2020). Examining the effects of oral reproduction and summary writing vocabulary tasks on L2 word learning: Technique feature analysis on trial. *Cogent Education*, 7(1), 25. <https://doi.org/10.1080/2331186x.2020.1795966>
  67. Namaziandost, E., Hosseini, E., & Utomo, D. W. (2020). A comparative effect of high involvement load versus lack of involvement load on vocabulary learning among Iranian sophomore EFL learners. *Cogent Arts & Humanities*, 7(1), 15. <https://doi.org/10.1080/23311983.2020.1715525>
  68. Rassaei, E. (2020). Effects of mobile-mediated dynamic and nondynamic glosses on L2 vocabulary learning: A sociocultural perspective. *Modern Language Journal*, 104(1), 284-303. <https://doi.org/10.1111/modl.12629>
  69. Xu, Y., & Zhang, J. (2020). Chinese compound word inference through context and word-internal cues. *Language Teaching Research*, 1-25. <https://doi.org/https://doi.org/10.1177/1362168820905811>

- 
70. Yang, Y., & Cao, X. (2020). Effects of task involvement load on L2 vocabulary acquisition and their association with language aptitude. *Asia-Pacific Education Researcher*. <https://doi.org/10.1007/s40299-020-00528-8>
  71. Alcaraz-Marmol, G. (2021). Glossing and L2 vocabulary learning through dynamic instruction in the context of primary education. *Revista De Linguistica Y Linguas Aplicadas*, 16, 1-10. <https://doi.org/10.4995/rlyla.2020.14691>
  72. Ansarin, A. A., & Khabbazi, S. K. (2021). Task-induced involvement load and working memory: Effects on active and passive vocabulary knowledge of EFL learners in a multimedia learning environment. *Eurasian Journal of Applied Linguistics*, 7(1), 277-302. <https://doi.org/10.32601/ejal.911288>
  73. Danilina, S. (2021). Collocational knowledge uptake by university students under online learning. *English Studies at Nbu*, 7(1), 97-117. <https://doi.org/https://doi.org/10.33919/esnbu.21.1.7>
  74. Hanks, L. (2021). The effect of vocabulary task type on student semantic and orthographic retention] (Publication No. 2531525944) [Master thesis, Northeastern Illinois University]. ProQuest Dissertations and Theses Global.
  75. San Mateo-Valdehita, A., & de Diego, C. C. (2021). Receptive and productive vocabulary acquisition: effectiveness of three types of tasks. Results from French students of Spanish as second language. *Onomazein* (51), 36-56. <https://doi.org/10.7764/onomazein.51.05>
  76. Silva, B. B., Kutylowska, K., & Otwinowska, A. (2021). Learning academic words through writing sentences and compositions: Any signs of an increase in cognitive load? *Language Teaching Research*. <https://doi.org/10.1177/13621688211020421>
  77. Taheri, S., & Golandouz, G. R. (2021). The effect of task type on EFL learners' acquisition and retention of vocabulary: an evaluation of the involvement load hypothesis. *Cogent Education*, 8(1), 21. <https://doi.org/10.1080/2331186x.2021.1915226>
  78. Teng, M. F., & Zhang, D. (2021). Task-induced involvement load, vocabulary learning in a foreign language, and their association with metacognition. *Language Teaching Research*. <https://doi.org/10.1177/13621688211008798>

**Supplementary Table S5.** Specific scales for rating studies

| WoE Scale       | Level  | Description                                                                                                                                 |
|-----------------|--------|---------------------------------------------------------------------------------------------------------------------------------------------|
| Soundness       | High   | The research methods and results are described clearly and in detail. The authors explain their results/findings clearly and transparently. |
|                 | Medium | The research methods and results are described satisfactorily. The results explained by the authors are generally satisfactory.             |
|                 | Low    | The description of research methods and results is vague. The results of the study explained by the authors are confusing                   |
| Appropriateness | High   | The methodology of the selected study is consistent with the review questions.                                                              |
|                 | Medium | The methodology of the selected study is partially consistent with the review questions.                                                    |
|                 | Low    | The methodology of the selected study is not consistent with the review questions.                                                          |
| Relevance       | High   | The selected studies provide sufficient information to answer the review questions.                                                         |
|                 | Medium | The selected studies provide some information that can be combined and/or synthesized to answer the review questions.                       |
|                 | Low    | The selected studies do not provide any information that could be combined and/ or synthesized to answer the review question.               |

**Supplementary Figure S2. High Frequency Task Types and the ILH Support in English as the Target Language Studies**

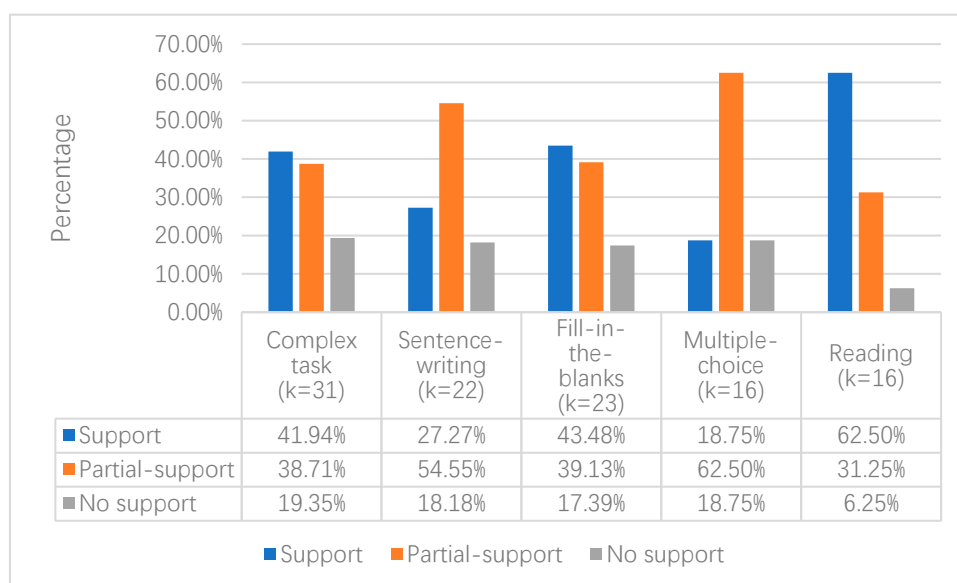



**Supplementary Figure S3.** Medium frequency task types and the ILH support in English as the target language studies

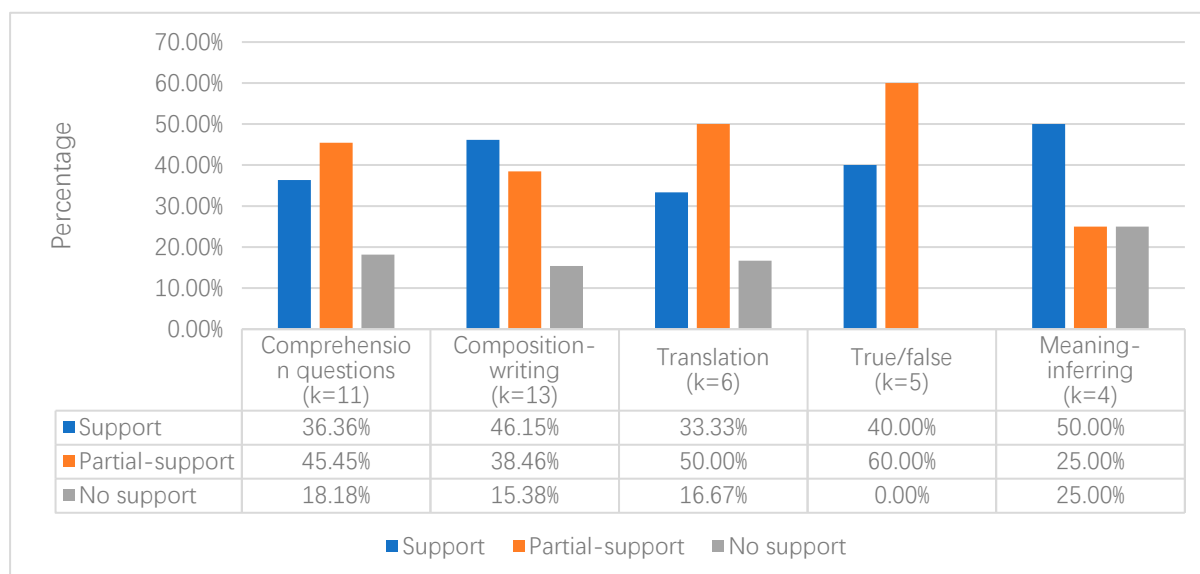

**Supplementary Figure S4.** Low frequency task types and the ILH support in English as the target language studies

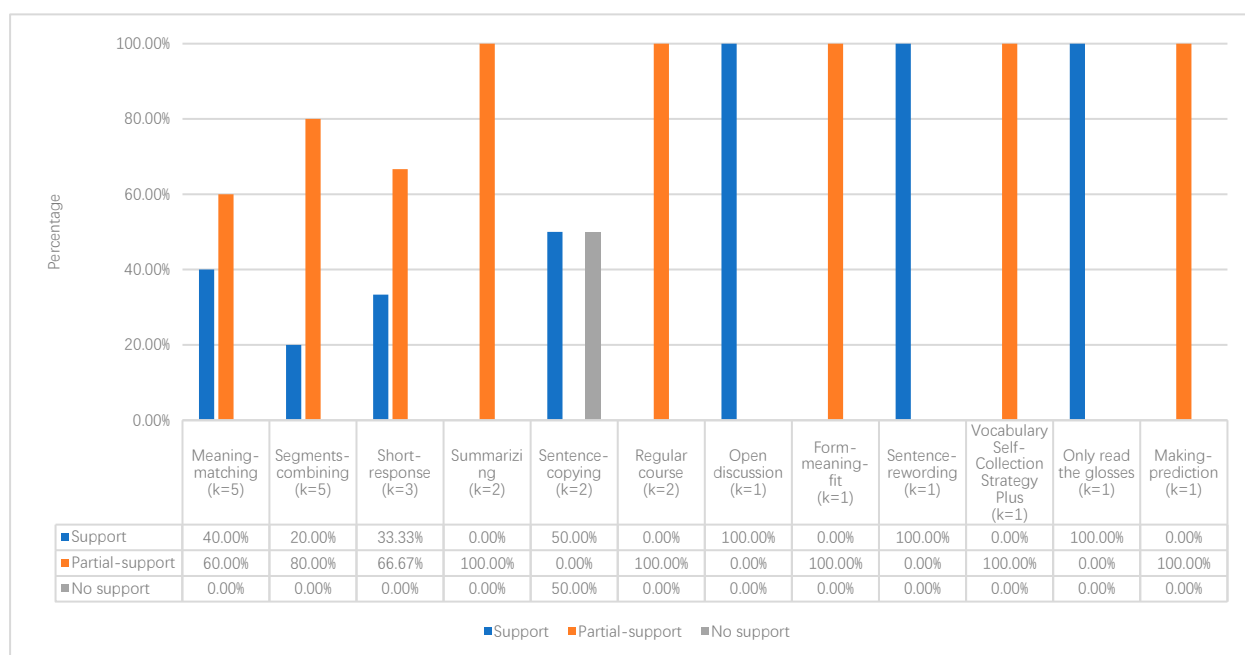

**Supplementary Figure S5.** High frequency task types and the ILH support in studies (any language as the target language)

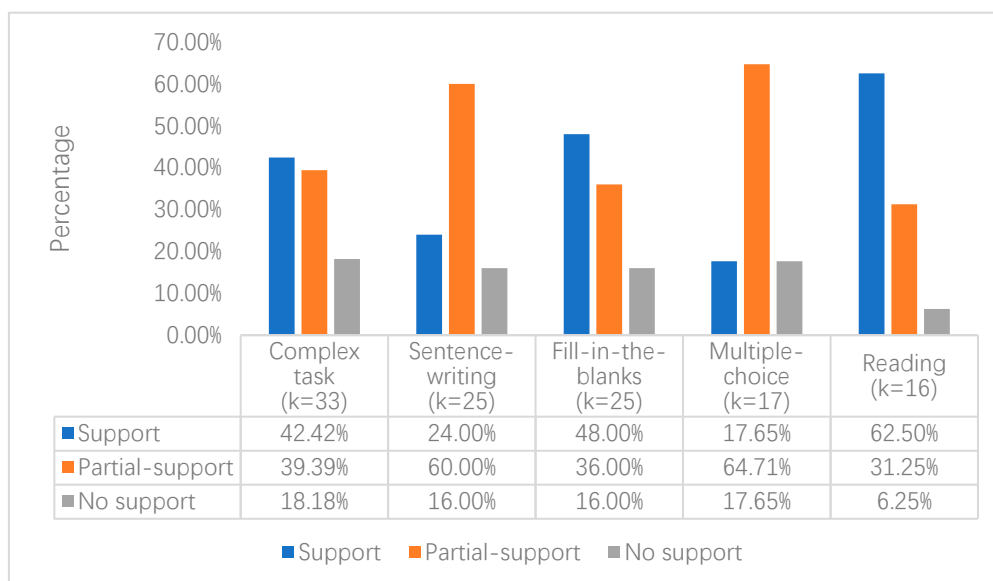

**Supplementary Figure S6.** Medium frequency task types and the ILH support in studies (any language as the target language)

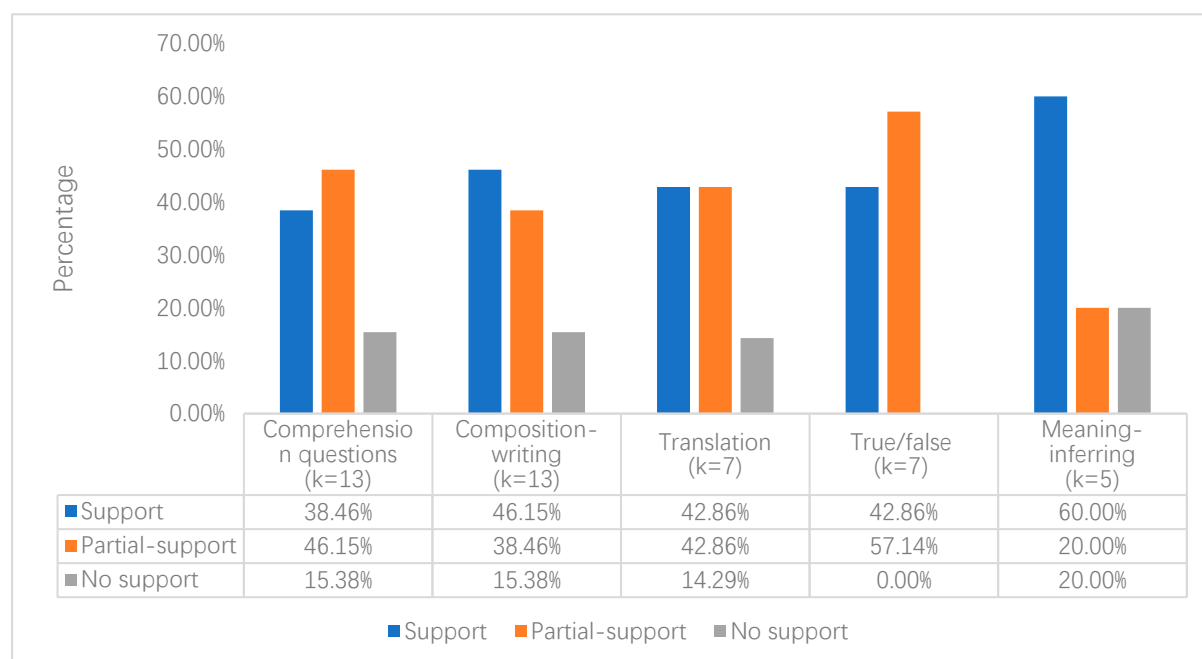

**Supplementary Figure S7.** Low frequency task types and the ILH support in studies (any language as the target language)

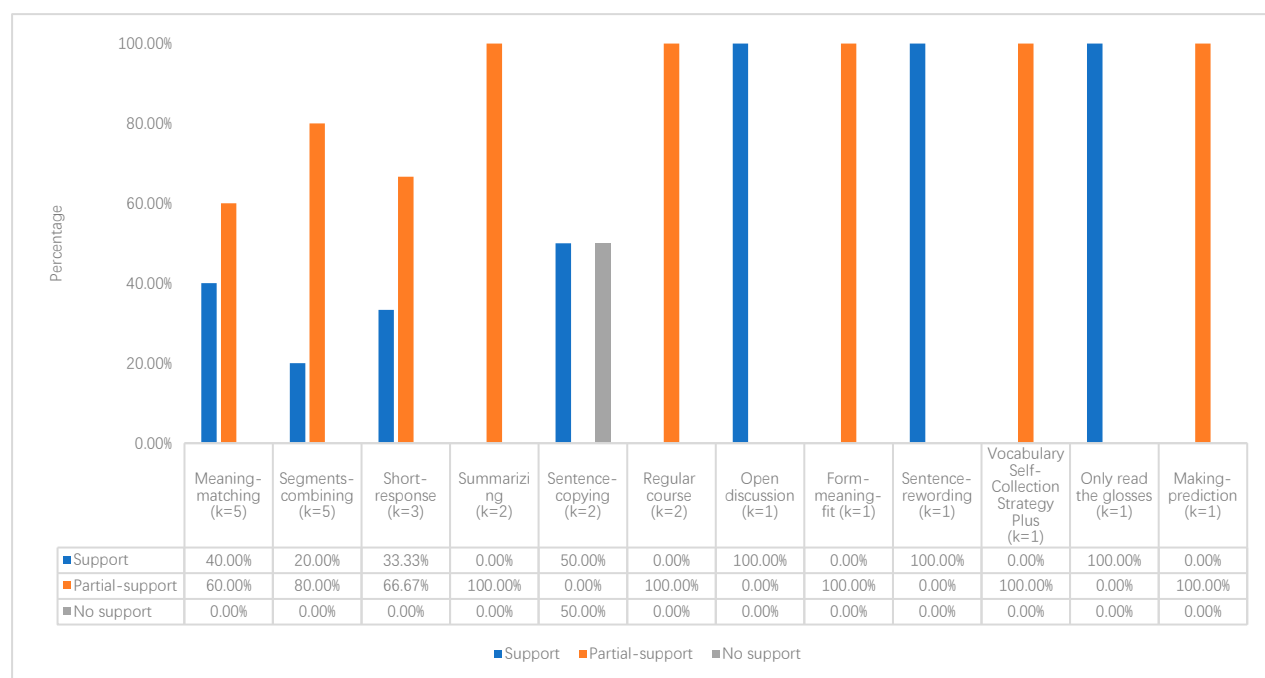

**Supplementary Table S6.** Prevalence of task types (language other than English as the target language)

| Task type               | Tasks |        |
|-------------------------|-------|--------|
|                         | n     | %      |
| Complex task            | 5     | 23.81  |
| Sentence-writing        | 3     | 14.29  |
| Fill-in-the-blanks      | 3     | 14.29  |
| Comprehension questions | 3     | 14.29  |
| Translation             | 2     | 9.52   |
| True/false              | 2     | 9.52   |
| Meaning-inferring       | 2     | 9.52   |
| Multiple-choice         | 1     | 4.76   |
| Total                   | 21    | 100.00 |

Note: The task types were given in descending order.

In general, six empirical studies had used the ILH as a framework to study non-English vocabulary learning. The targeted languages were Spanish, Italian, German, and Chinese. A total of 21 different tasks were scattered across eight types (See Table S6).

Similar to English as the target language studies, the most common task type of other language as target language studies was the complex task type, combining several individual tasks into one task. A total of five different complex tasks were found in two studies. One study showed that complex tasks designed for Italian vocabulary learning provided support for the predictability of the ILH (Rukholm, 2011). The other study found that complex tasks designed for Spanish vocabulary learning provided only partial support for the predictability of the ILH (Keating, 2008).

A total of three different sentence-writing tasks were scattered among three studies. All of the three studies showed that sentence-writing tasks provided at least some support for the predictability of the ILH. In Rukholm (2011)'s study of Italian vocabulary learning, the sentence writing task provided support for the ILH. Two other studies provided partial support

for the predictability of the ILH in Spanish vocabulary learning (Keating, 2008; San Mateo-Valdehita & de Diego, 2021). Regarding fill-in-the-blanks task type, a total of three different tasks were found in two studies. Similarly, the tasks designed for Italian vocabulary learning provided support for the ILH (Rukholm, 2011), and the task designed for Spanish vocabulary learning provided partial support for the ILH (San Mateo-Valdehita & de Diego, 2021). Three different comprehension questions tasks were found in two studies. The study which investigated German vocabulary learning showed partial support for the ILH (Peters, 2007). The study which investigated Italian vocabulary learning showed support of the ILH (Rukholm, 2011).

Two different translation tasks were compared in one study which focused on Spanish vocabulary learning. The results corroborated the assumption of the ILH that that different specific tasks with the same IL have the same vocabulary learning effect when other factors are equal (Laufer & Hulstijn, 2001). Two different true/false tasks were found in two studies. Similar to the complex tasks, the true/false task designed for Italian vocabulary learning provided support for the ILH, while the true/false task designed for Spanish vocabulary learning partially supported the ILH (Keating, 2008; Rukholm, 2011). Two different meaning-infering tasks were compared in one study which focused on Chinese vocabulary learning (Xu & Zhang, 2020). In this study, researchers compare two meaning-infering tasks with different ILs. The meaning-infering task with higher IL was found more effective in Chinese vocabulary learning than the meaning-infering task with lower IL. The results corroborated the second assumption of the ILH that "Other factors being equal, words which are processed with higher involvement load will be retained better than words which are processed with lower

involvement load” (Laufer & Hulstijn, 2001, p. 15). Only one multiple-choice task was found in one study. The results showed partial support for the ILH in the context of Spanish vocabulary learning (San Mateo-Valdehita & de Diego, 2021).

### *References:*

- Rukholm, V. N. (2011). *Facilitating lexical acquisition in beginner learners of Italian through popular song* (Publication No. 1323346428) [Doctoral dissertation, University of Toronto]. ProQuest Dissertations and Theses Global.
- Keating, G. D. (2008). Task effectiveness and word learning in a second language: The involvement load hypothesis on trial. *Language Teaching Research*, 12(3), 365-386. <https://doi.org/10.1177/1362168808089922>
- San Mateo-Valdehita, A., & de Diego, C. C. (2021). Receptive and productive vocabulary acquisition: effectiveness of three types of tasks. Results from French students of Spanish as second language. *Onomazein* (51), 36-56. <https://doi.org/10.7764/onomazein.51.05>
- Peters, E. (2007). Manipulating L2 learners' online dictionary use and its effect on L2 word retention. *Language Learning & Technology*, 11(2), 36-58.
- Laufer, B., & Hulstijn, J. (2001). Incidental vocabulary acquisition in a second language: The construct of task-induced involvement [Article]. *Applied Linguistics*, 22(1), 1-26. <https://doi.org/10.1093/applin/22.1.1>
- Xu, Y., & Zhang, J. (2020). Chinese compound word inference through context and word-internal cues. *Language Teaching Research*, 1-25. <https://doi.org/https://doi.org/10.1177/1362168820905811>
